# Supplementary material for: Deterministic Evolutionary Trajectories Influence Primary Tumor Growth: TRACERx Renal
Source: PubMed Central journal article supplement (PMC5938372; doi:10.1016/j.cell.2018.03.043), 2018-04-19

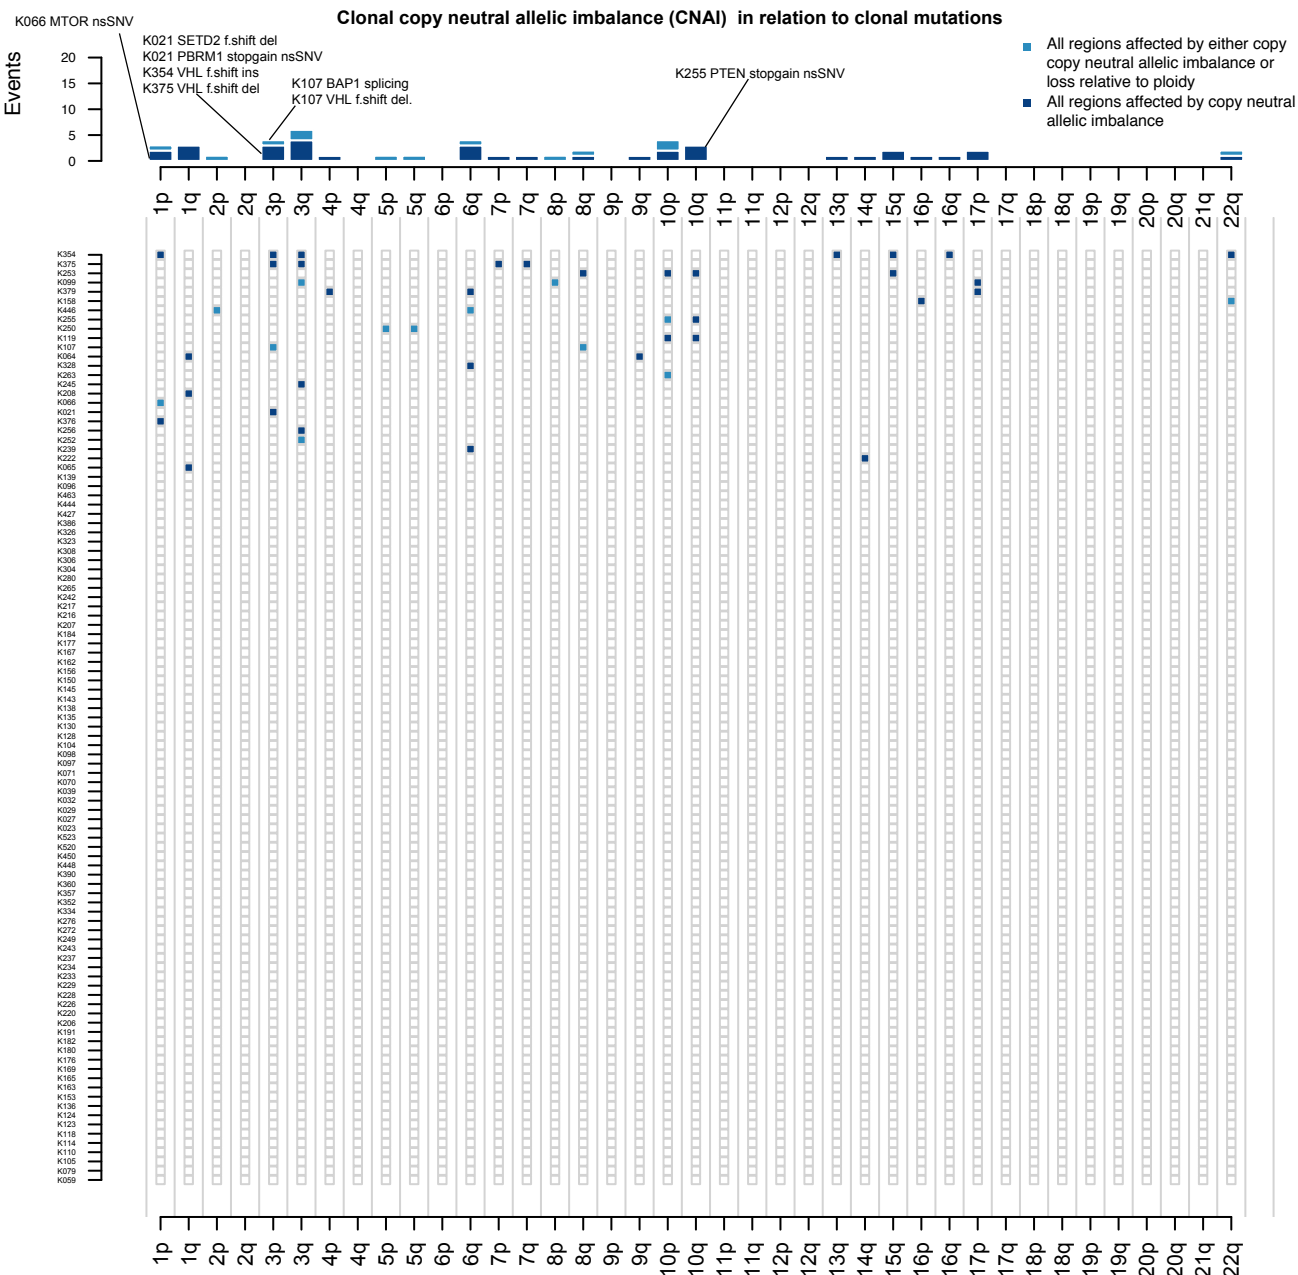

The top panel of this figure is bar chart depicting the number of ubiquitous (present in all regions sequenced for a patient) copy neutral allelic imbalance (CNAI) events in dark blue and the number of ubiquitous CNAI/loss in the cohort for all chromosome arms is indicated in light blue. Patients with co-occurring clonal mutations on these chromosomal arms are shown by lines to the corresponding chromosome arms. The bottom panel is a heatmap indicating which patients' disease from the cohort have either ubiquitous CNAI events (dark blue) or ubiquitous CNAI/loss events (light blue).

# Patient K059

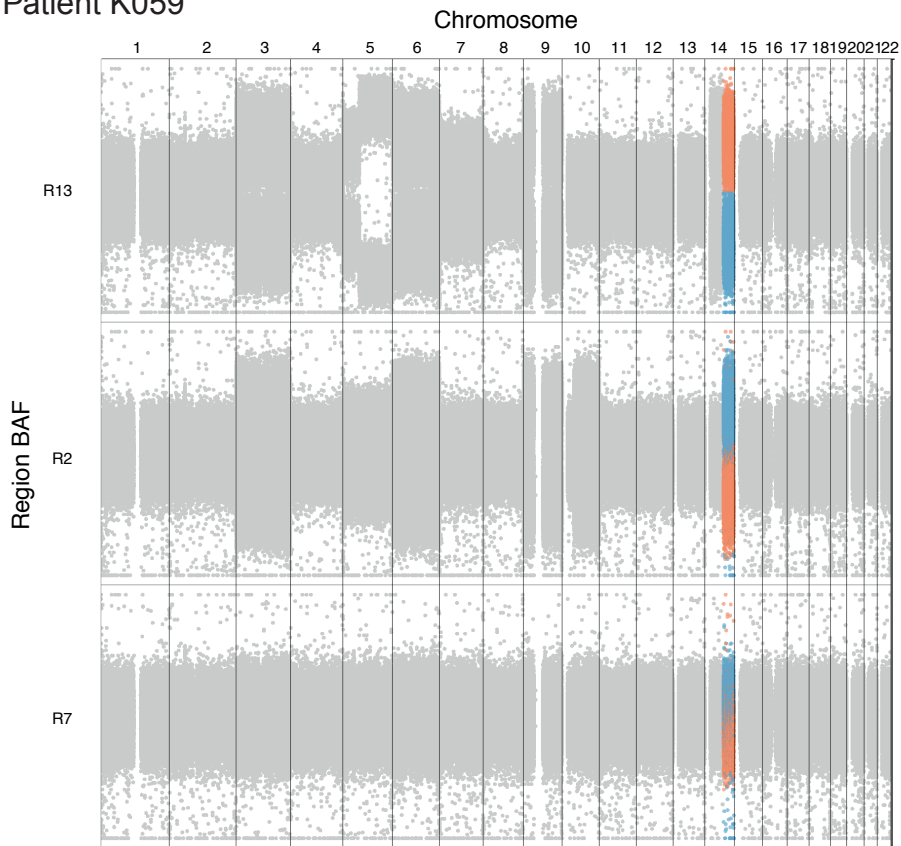

B-allele frequency profile of heterozygous SNPs across the genome (chromosomes 1-22) from all regions obtained from the multi-region whole genome sequencing from the patient's disease. Sections of BAF in regions that have mirrored subclonal allelic imbalance are highlighted in blue or orange. This legend applies to the other patient specific figures of the same format in this document.

# Patient K071

Chromosome

1 2 3 4 5 6 7 8 9 10 11 12 13 14 15 16 17 18 19 20 21 22

Region BAF

R1

R2

R3

R4

R7

R8

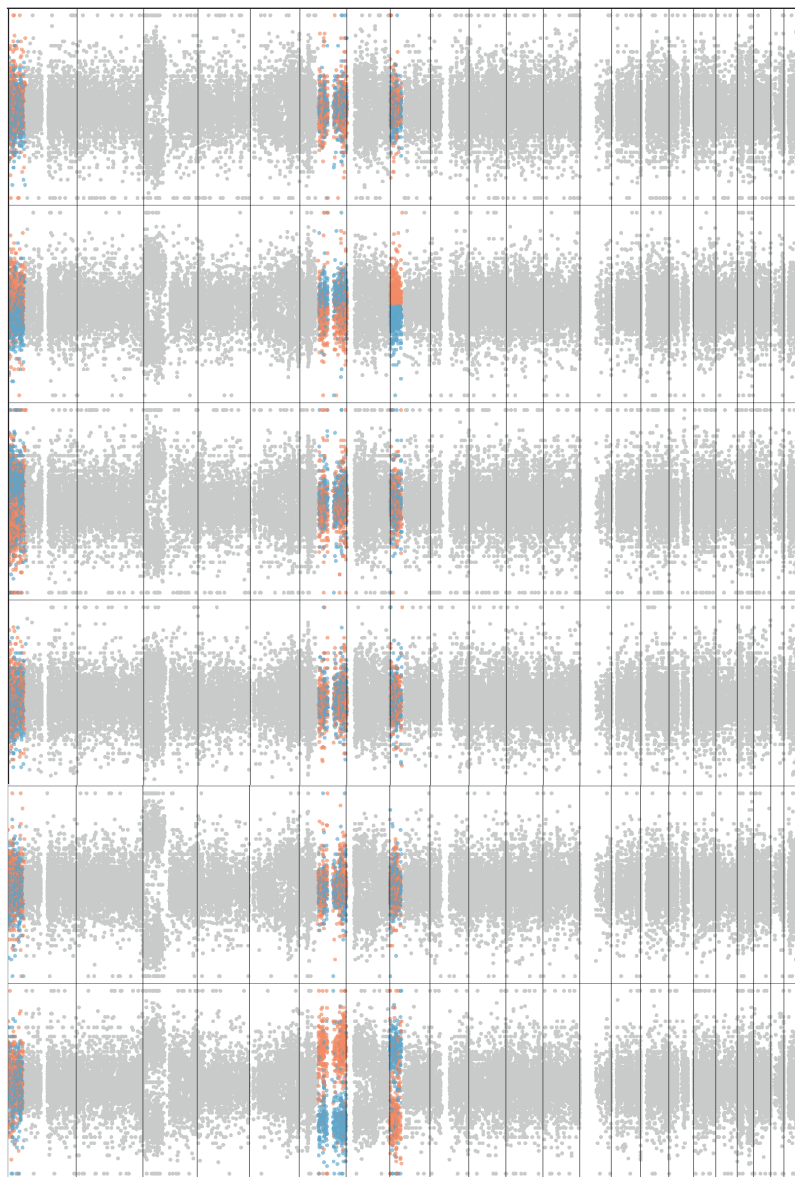

# Patient K099

Chromosome

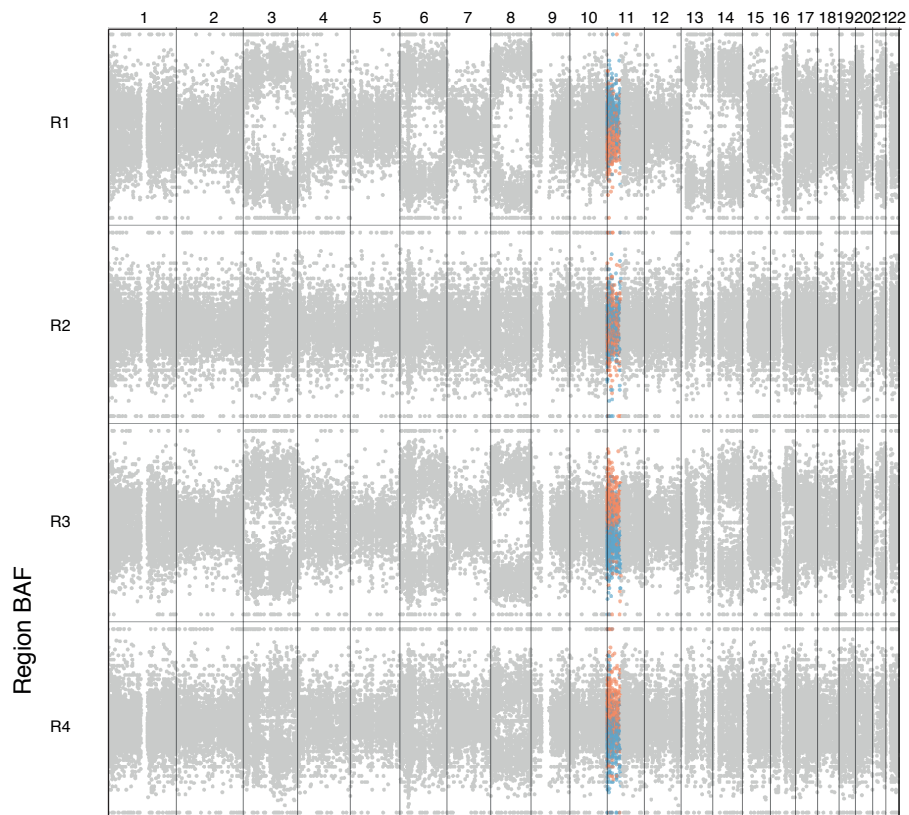

Patient K104 focal  
chr8:30242747-47499801

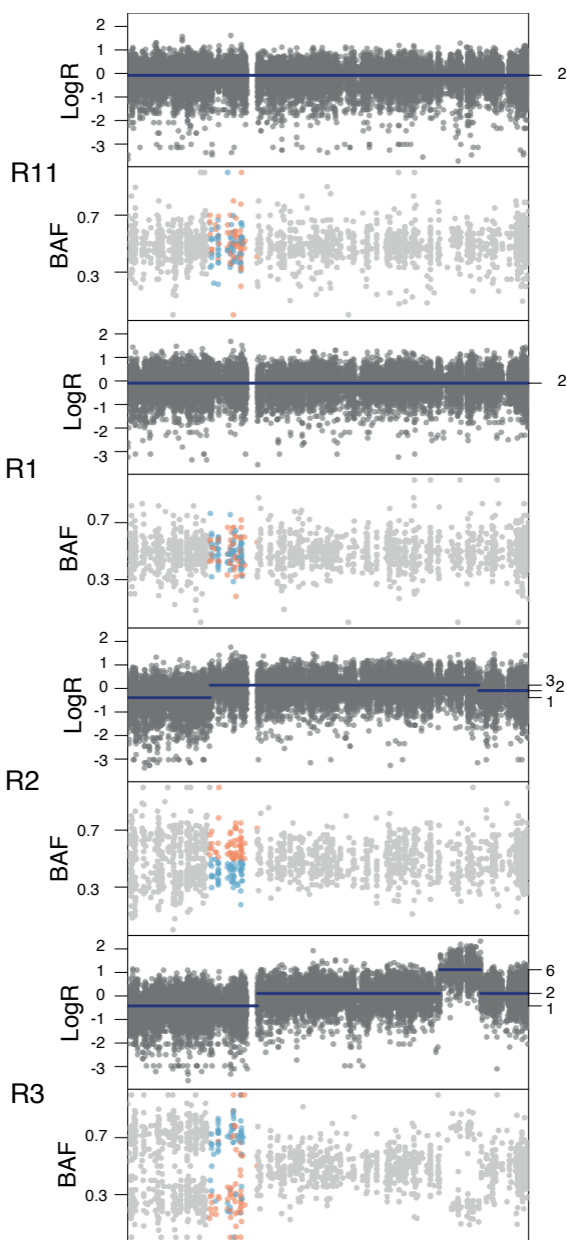

Shows the BAF and LogR (log ratio of the relative levels of sequencing coverage in the tumor region versus the germline normal) profile across part of chromosome 8 for all regions of the tumor samples that underwent whole exome sequencing from patient's disease. Each region has a plot of LogR below with the total copy number assigned to each segment on right of the plot, it also has a BAF plot below. The BAF in regions that have mirrored subclonal allelic imbalance are highlighted in blue or orange. This legend applies to the ther patient specific figures of the same format in this document.

# Patient K107

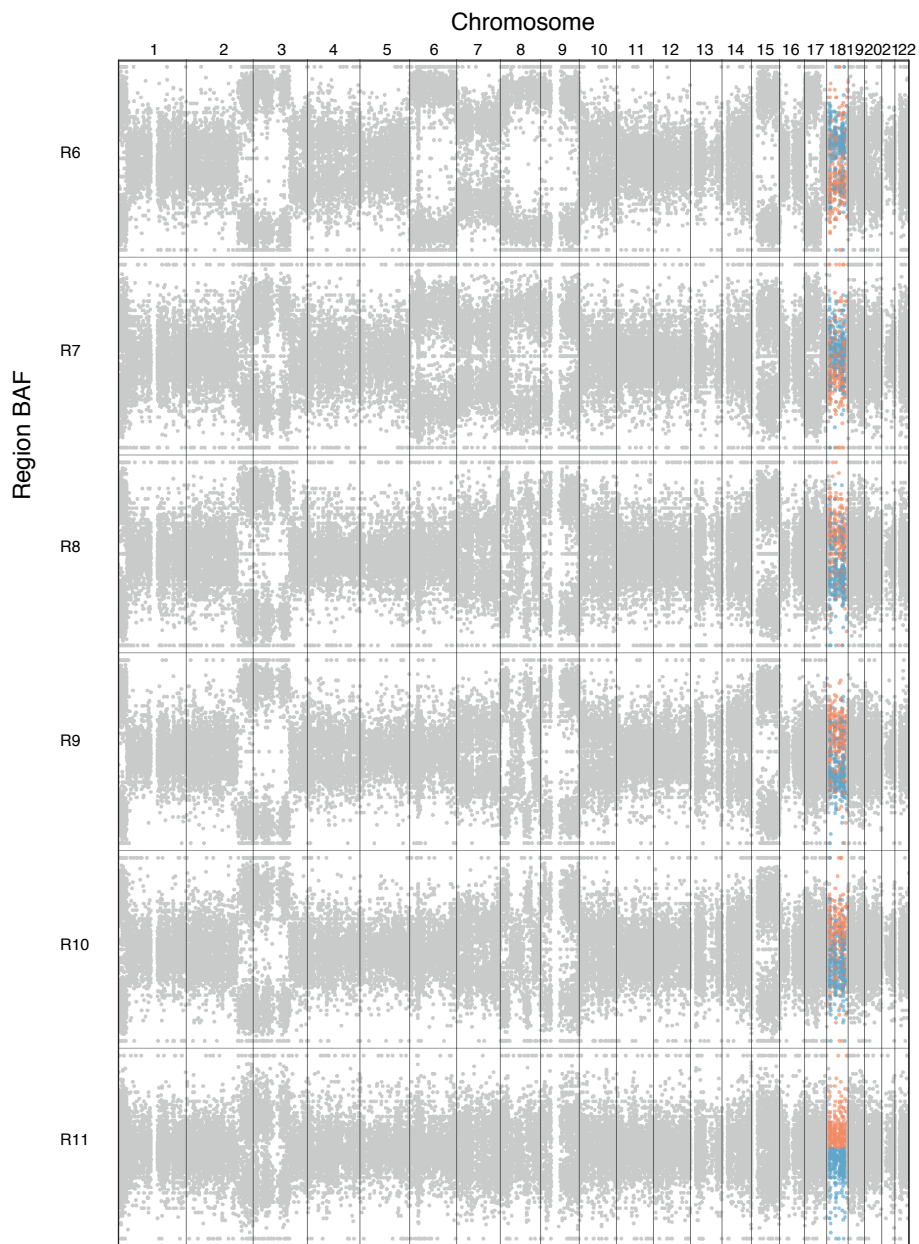

Patient K143

Chromosome

1 2 3 4 5 6 7 8 9 10 11 12 13 14 15 16 17 18 19 20 21 22

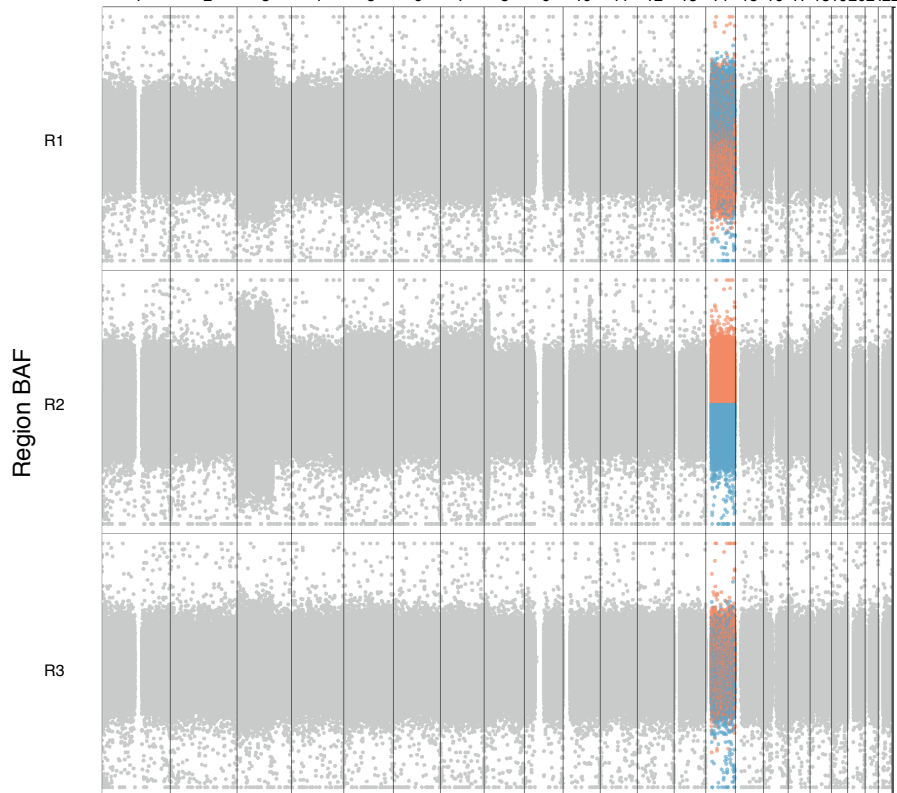

# Patient K150

Chromosome

1 2 3 4 5 6 7 8 9 10 11 12 13 14 15 16 17 18 19 20 21 22

R1

R2

R3

Region BAF

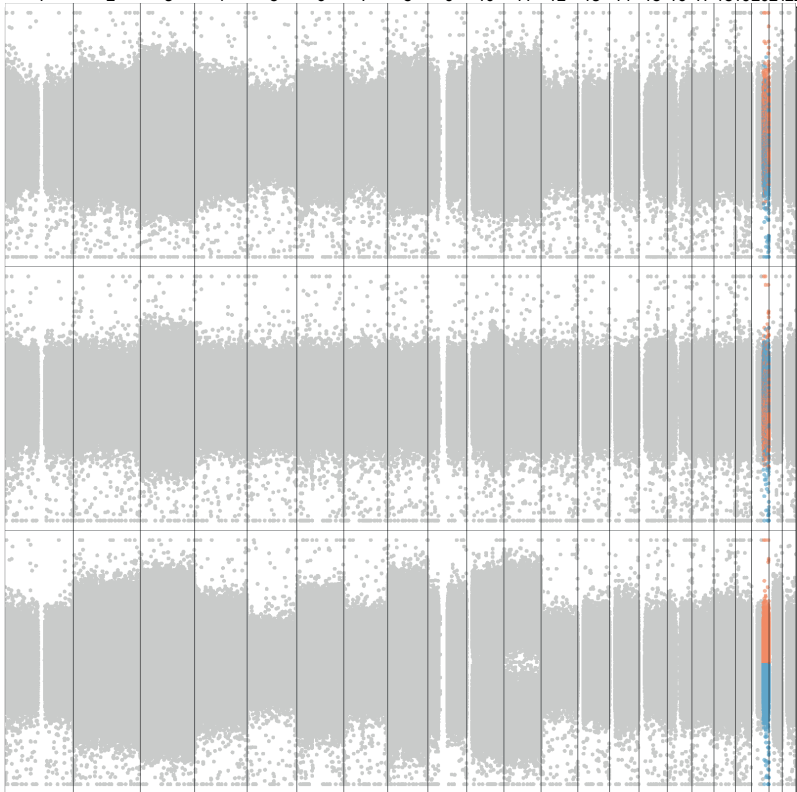



Patient K153 chr8  
chr8:54000135-55281514

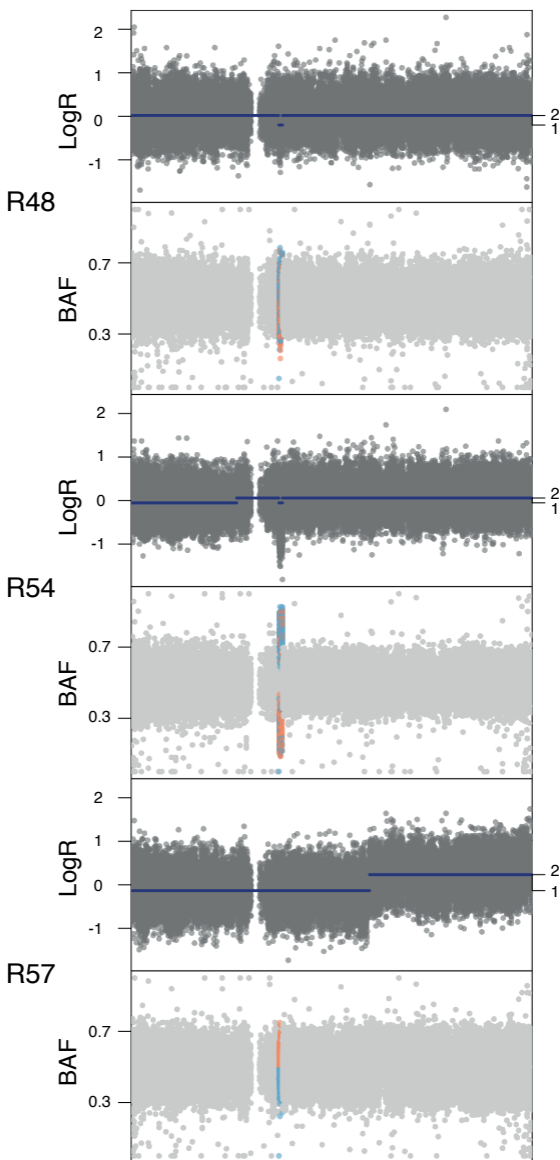

# Patient K161

Chromosome

1 2 3 4 5 6 7 8 9 10 11 12 13 14 15 16 17 18 19 20 21 22

Region BAF

R1  
R2  
R3  
R4  
R5  
R6  
R7  
R8  
R9  
R10

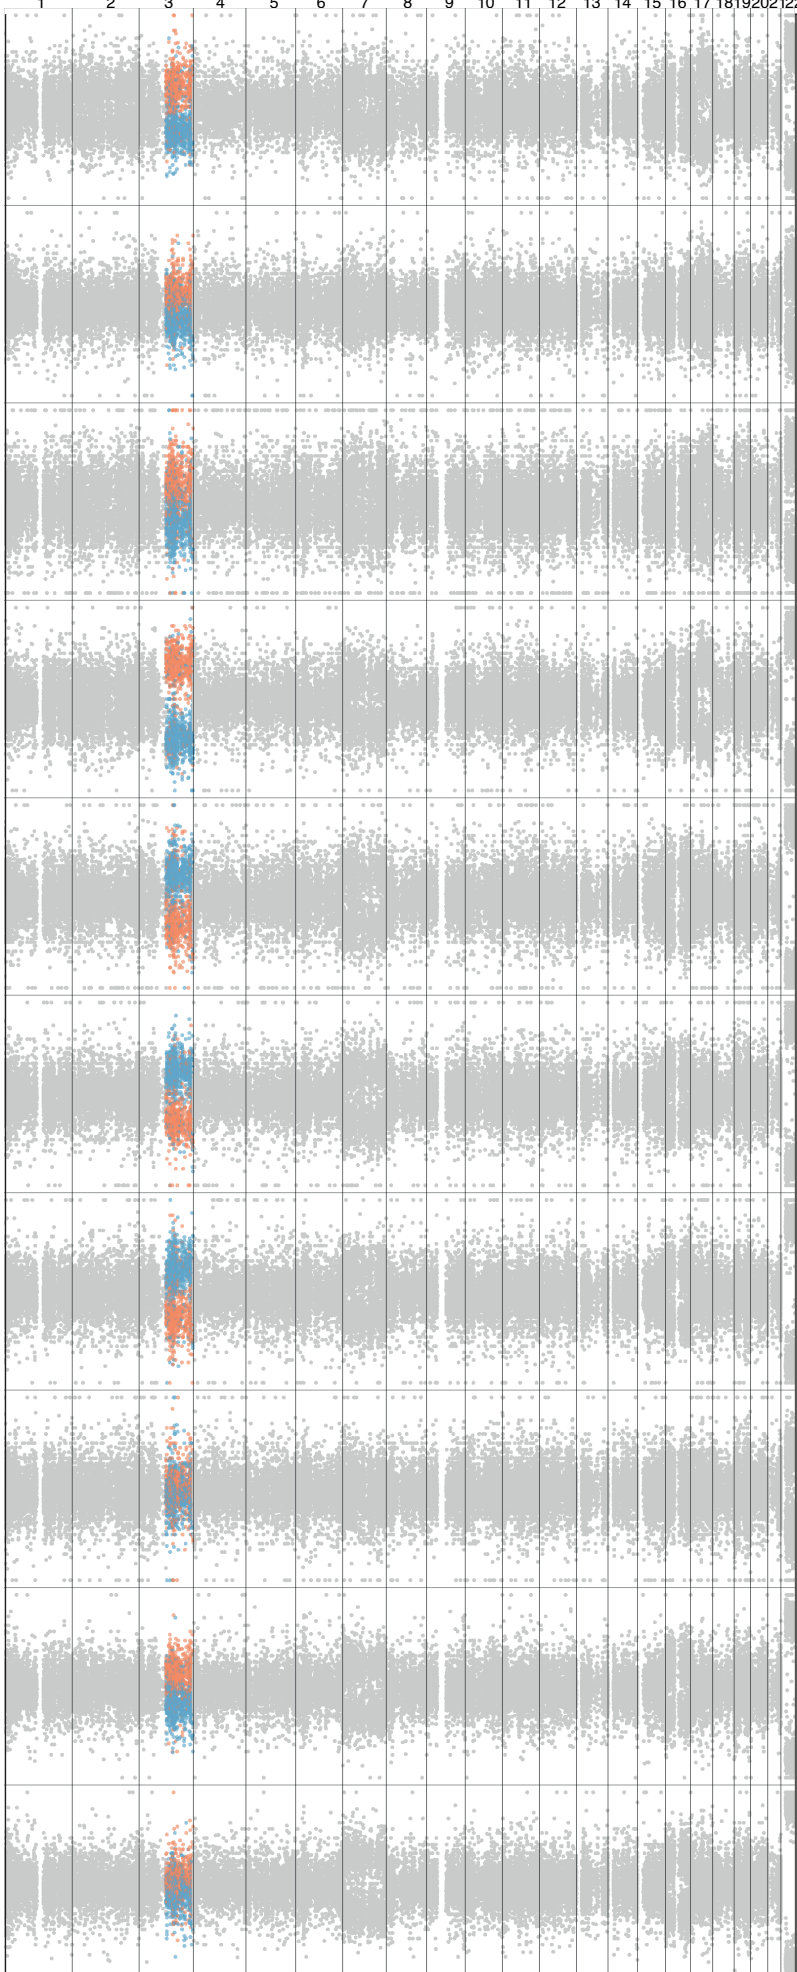

# Patient K162

Chromosome

1 2 3 4 5 6 7 8 9 10 11 12 13 14 15 16 17 18 19 20 21 22

Region BAF

R4

R6

R7

Normal

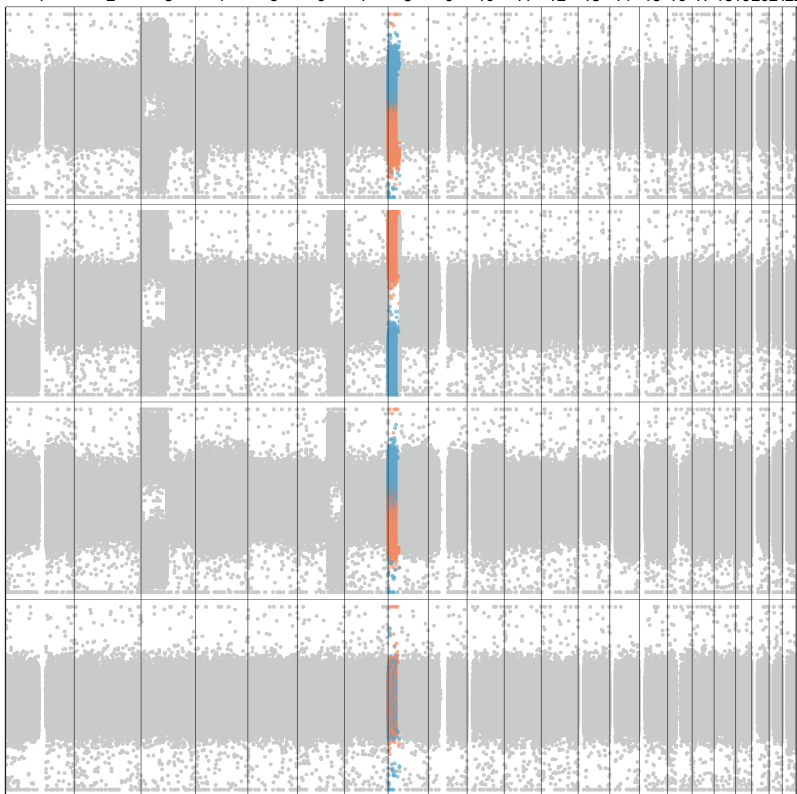

# Patient K163

Chromosome

1 2 3 4 5 6 7 8 9 10 11 12 13 14 15 16 17 18 19 20 21 22

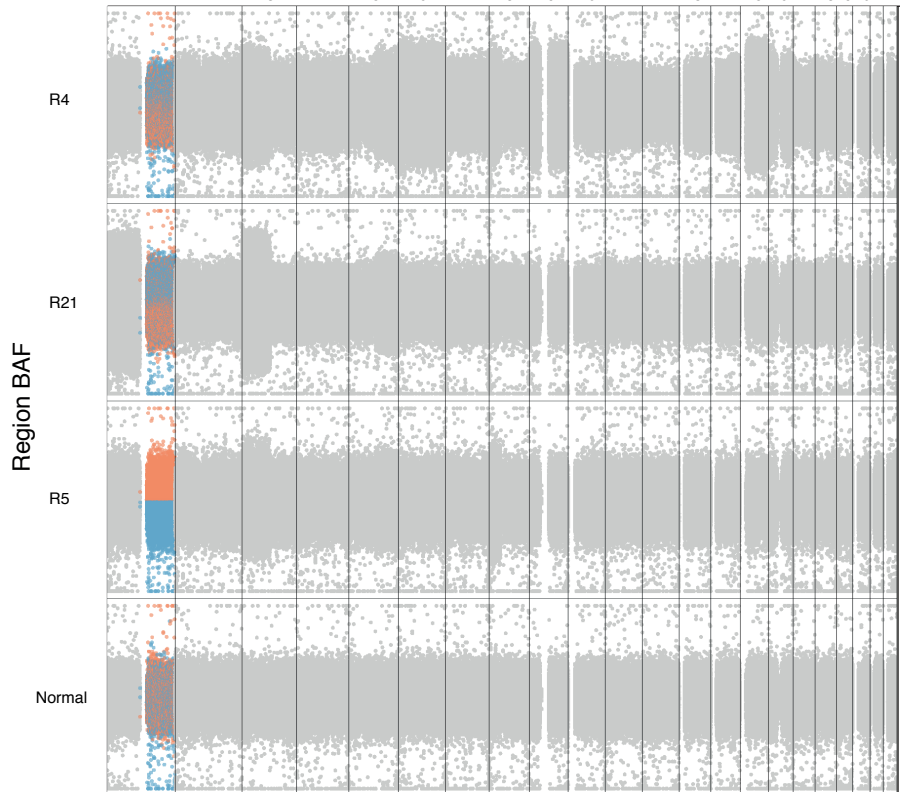

Patient K167 focals  
chr11:66414915-67923282  
chr11:71963129-73780167

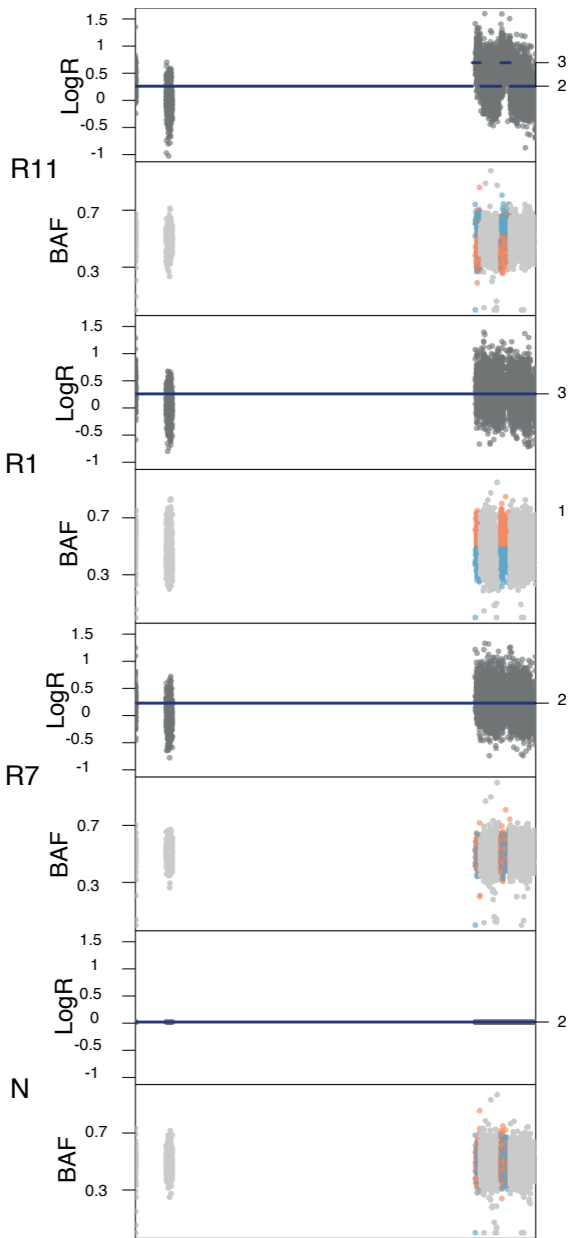

# Patient K169

Chromosome

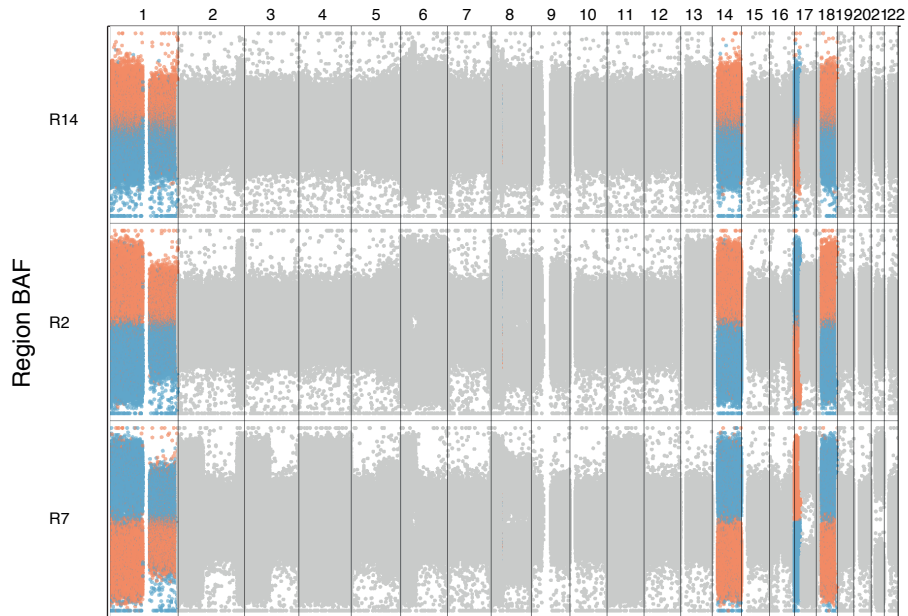

Patient K169 focal  
chr8:46876986-47377780

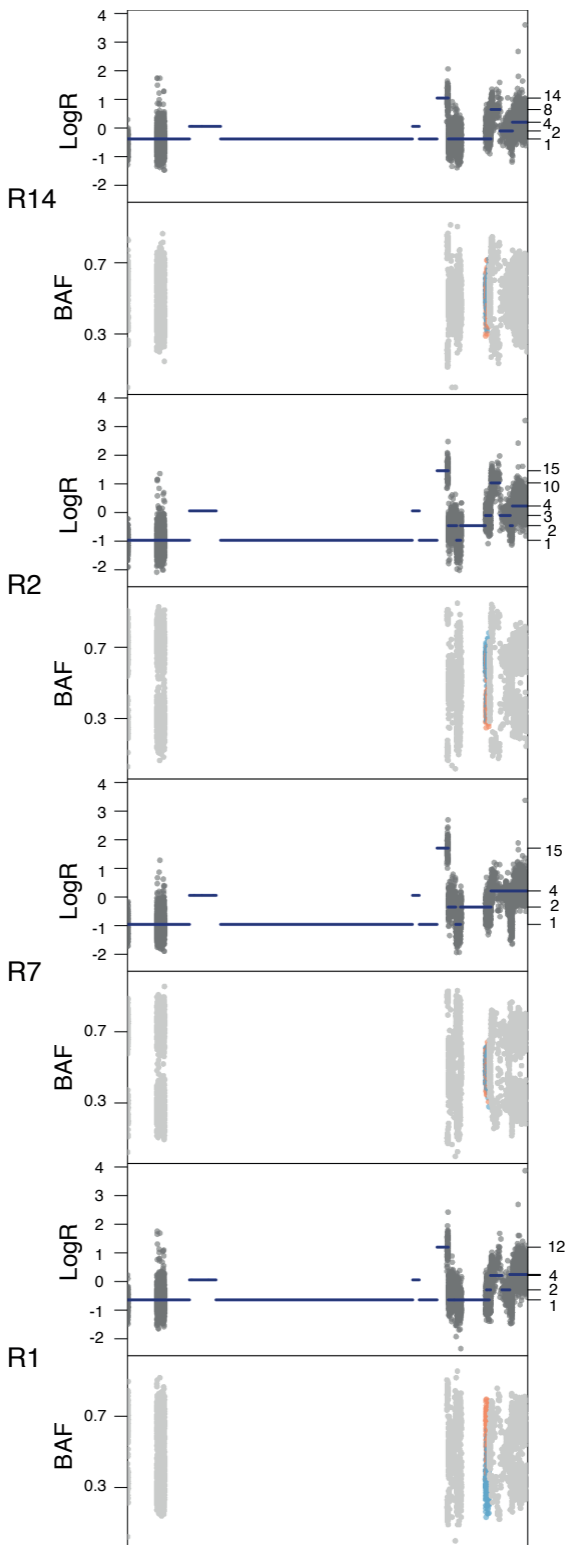

# Patient K178

Chromosome

1 2 3 4 5 6 7 8 9 10 11 12 13 14 15 16 17 18 19 20 21 22

Region BAF

R1

R2

R3

R4

R5

R6

R7

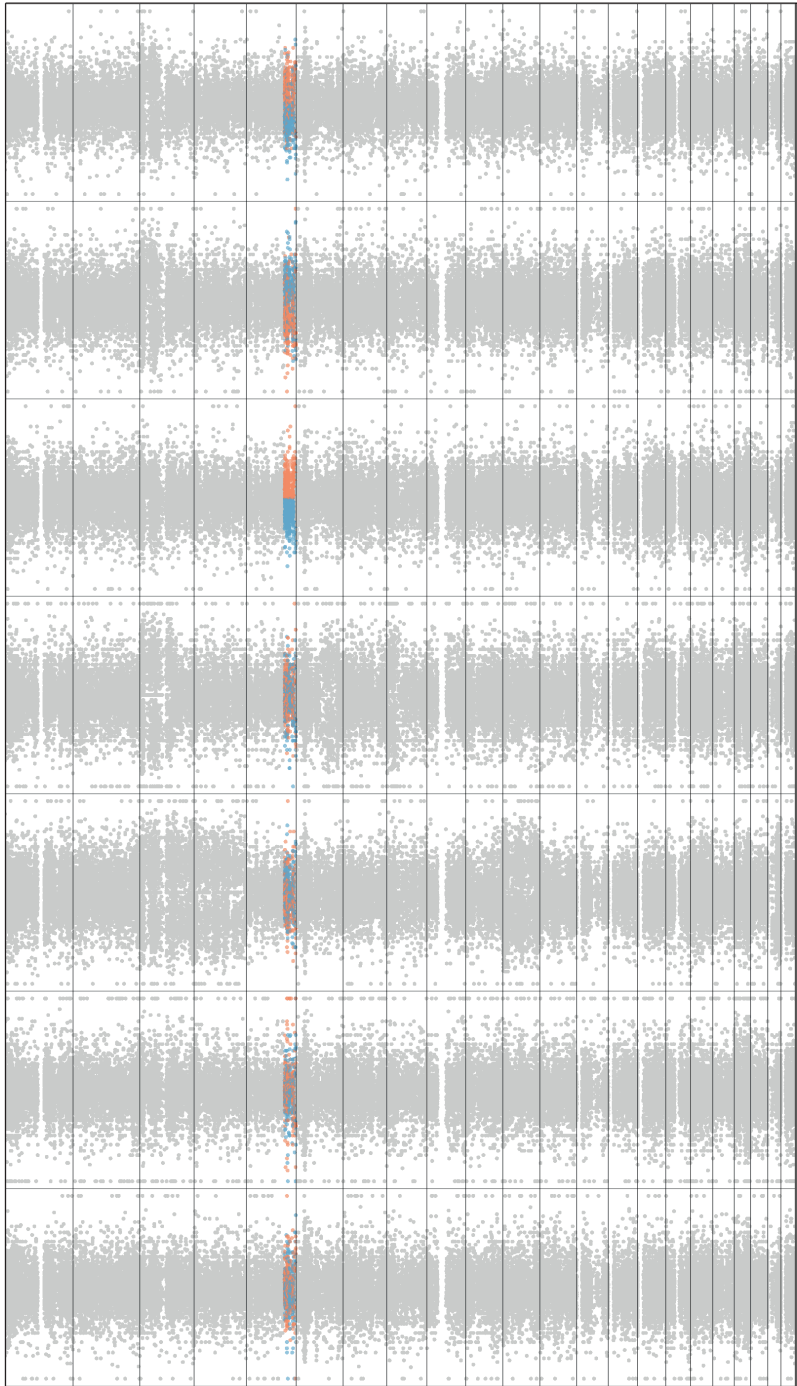



# Patient K180

Chromosome

1 2 3 4 5 6 7 8 9 10 11 12 13 14 15 16 17 18 19 20 21 22

Region BAF

R25

R30

R6

Normal

R9

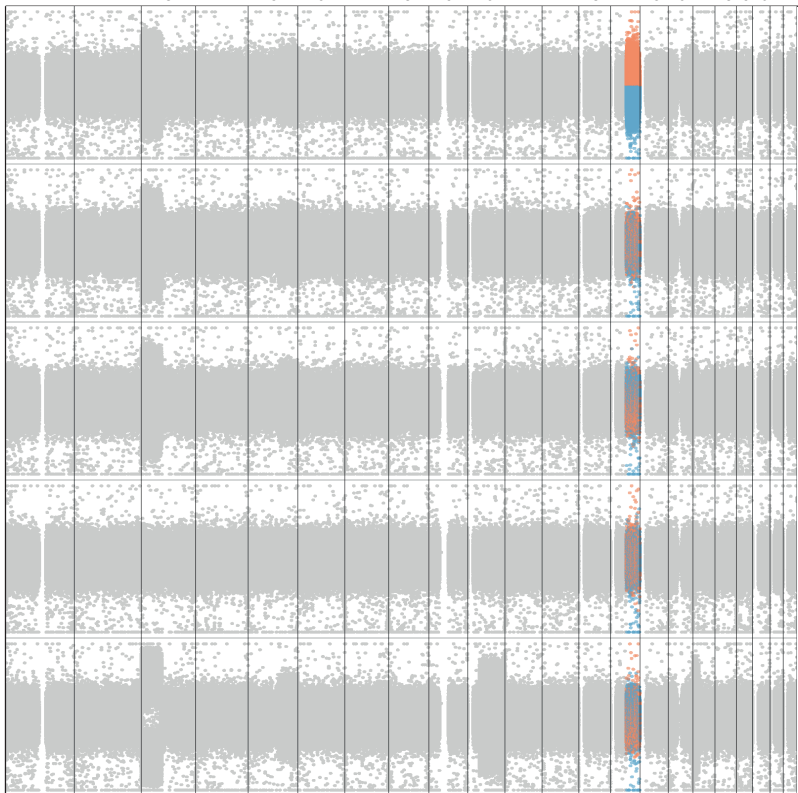

# MSAI Summary

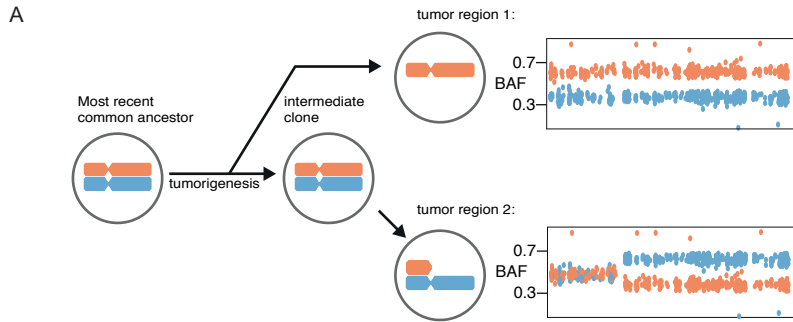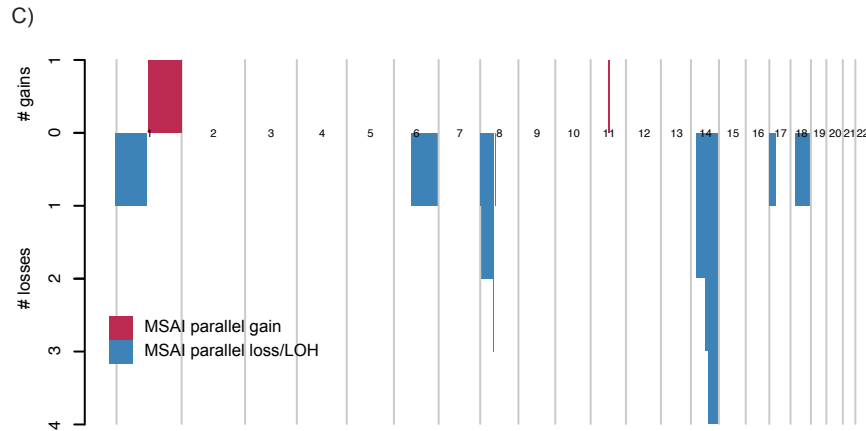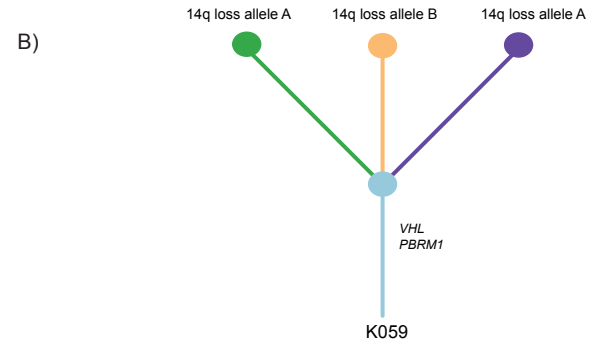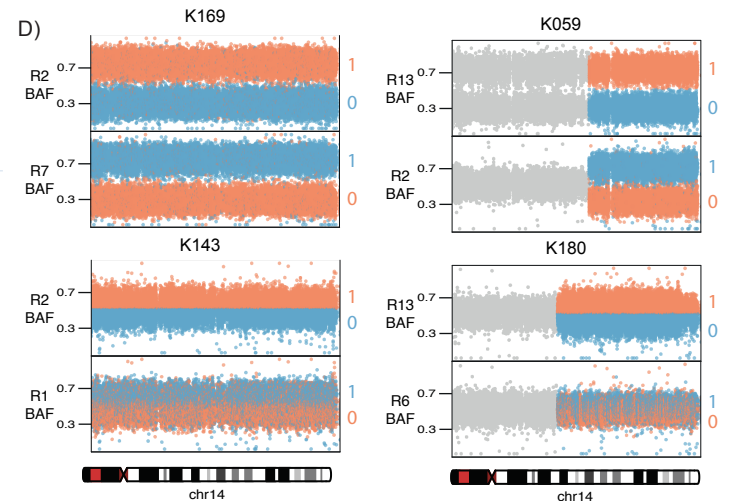

A) Shows a schematic of how a parallel copy number losses could result in mirrored subclonal allelic imbalance (MSAI). This occurs when the maternal allele is gained or lost in a subclone in one region and the paternal allele is gained or lost in a different subclone in another region. In the schematic the entire paternal (blue) chromosome is lost in R1 leading to the allelic imbalance seen in B-allele frequency (BAF) plot with the heterozygous SNPs' from the paternal (blue) chromosome having higher BAF values. In R2 the q arm of the maternal (orange) chromosome is lost leading to isolated allelic imbalance in the plot to the right with the heterozygous SNPs originating from q arm paternal q arm having higher BAF values. B) Phylogenetic tree indicating the subclonal loss of 14q from different alleles in the three regions that underwent whole genome sequencing. C) Shows the genomic position and size of all MSAI events found in the multi-region exome and multi-region whole genome sequencing performed in this study. This includes MSAI events that result from heterogeneous gains and losses relative to ploidy in same patient's disease. MSAI parallel loss of 14q is the most common event. D) Shows the B-allele frequency (BAF) plots of two regions from each patient's disease that demonstrates MSAI through parallel loss relative to ploidy and loss of heterozygosity in chromosome 14.

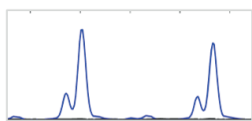

K280\_R9

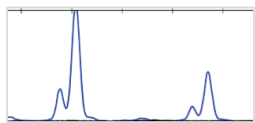

K280\_R12

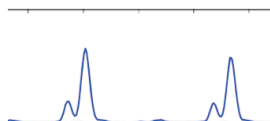

K280\_R14

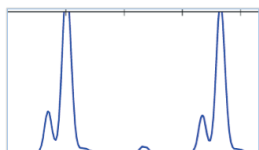

K280\_R16

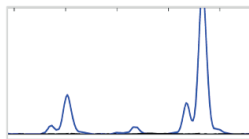

K280\_R19

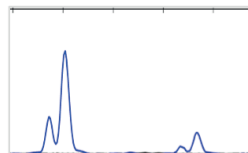

K280\_R24

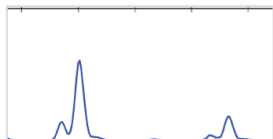

K280\_R29

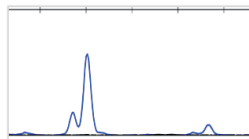

K280\_37

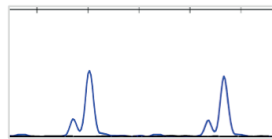

K280\_B

PCR fragment analysis using microsatellite marker D14S306 validating subclonal loss and MSAI (R19) in patient K280. Each number following the patient identifier indicates a tumor region and the germline is indicated by a 'B'.

## MSAI validation

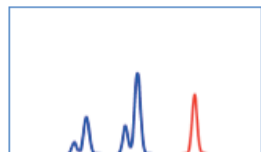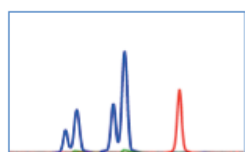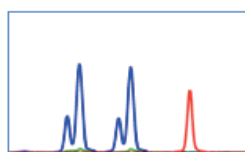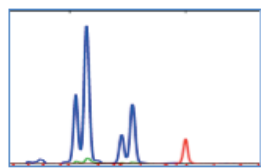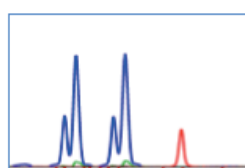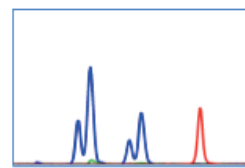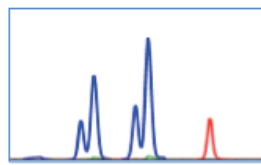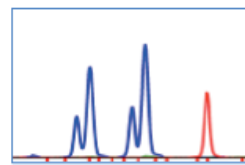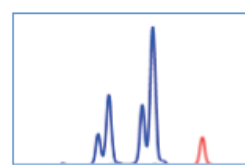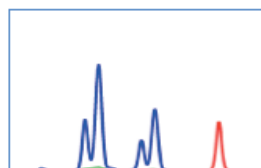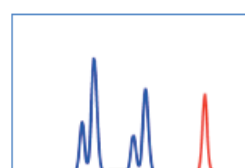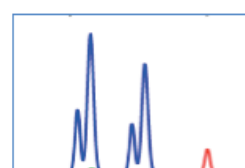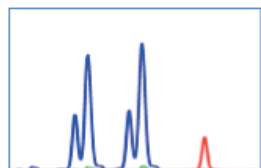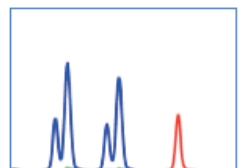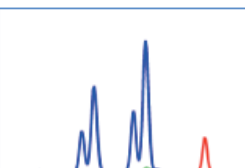

PCR fragment analysis using microsatellite marker D14S306 validating subclonal loss and MSAI (R4, R8 & R14) in patient K243.

**K265** (Primary tumour 1: R1, R3; Primary tumour 2: R5 - R8)

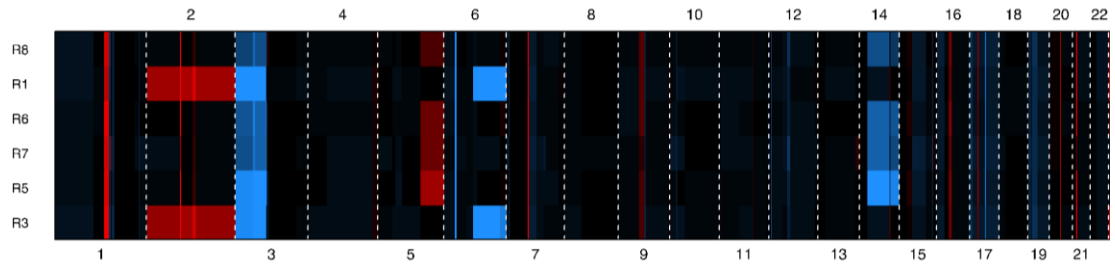

**K334** (Left primary tumour: R11 - R13; Right primary tumour: R1, R5 - R8)

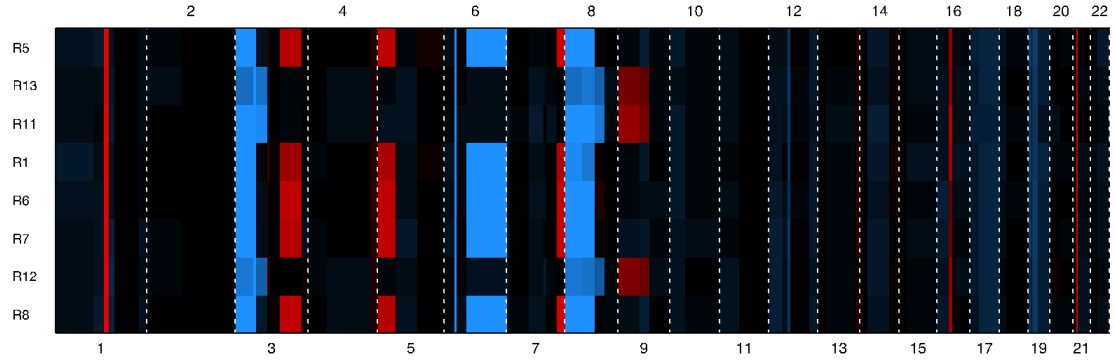

**K352** (Primary tumour 1: R1, R2, R3; Primary tumour 2: R4, R5, R6)

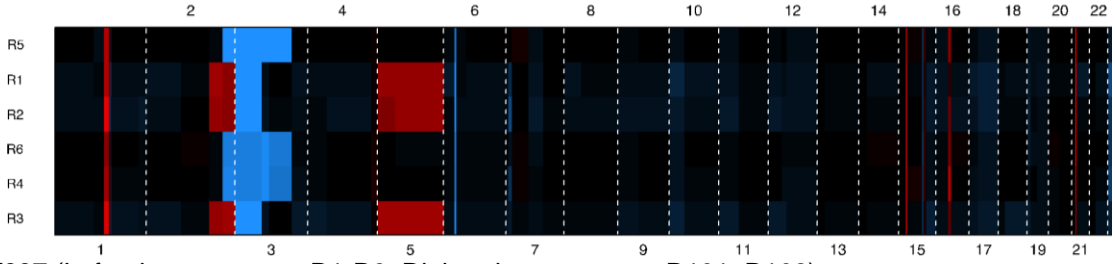

**K097** (Left primary tumour: R1-R3; Right primary tumour: R101, R102)

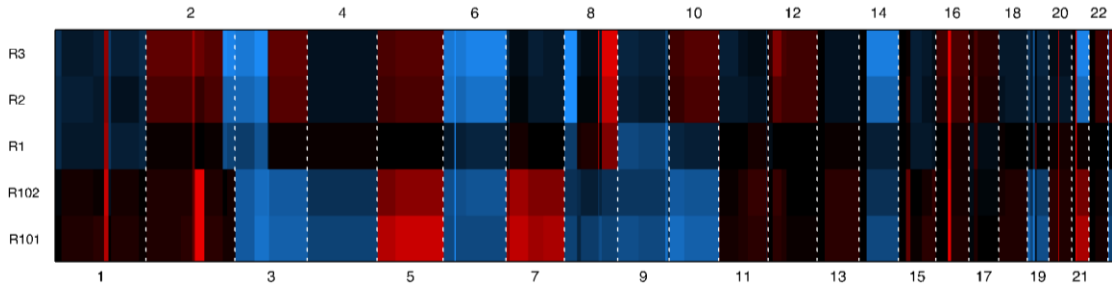

**K114** (Left primary tumour: R1 - R4; Right primary tumour: R101 - R103)

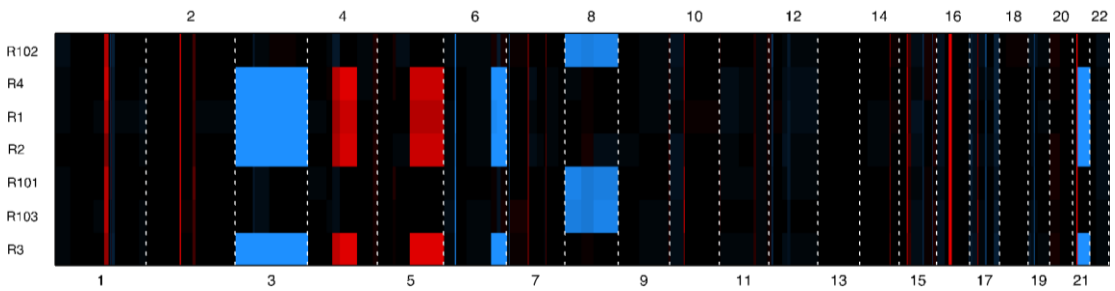

Supplement: mmc8.pdf [file mmc8.pdf]
