# Supplementary material for: Deterministic Evolutionary Trajectories Influence Primary Tumor Growth: TRACERx Renal
Source: PubMed Central journal article supplement (PMC5938372; doi:10.1016/j.cell.2018.03.043), 2018-04-19

| Case | Clones_Exome | Clones_Panel_Matched |
|------|--------------|----------------------|
| K376 | 1            | 1                    |
| K064 | 2            | 1                    |
| K065 | 2            | 1                    |
| K143 | 3            | 2                    |
| K027 | 5            | 3                    |
| K099 | 5            | 3                    |
| K386 | 4            | 4                    |
| K098 | 3            | 7                    |
| K130 | 5            | 4                    |
| K139 | 7            | 4                    |
| K128 | 4            | 5                    |

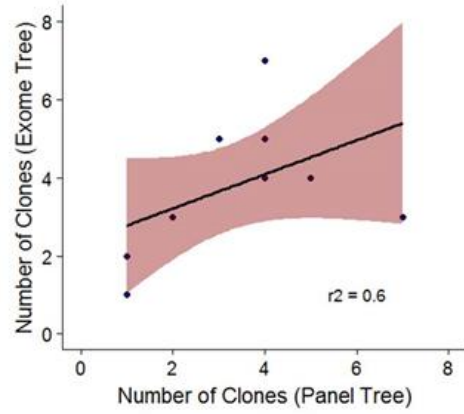

Supplement: mmc5.pdf [file mmc5.pdf]
