# Supplementary material for: Deterministic Evolutionary Trajectories Influence Primary Tumor Growth: TRACERx Renal
Source: PubMed Central journal article supplement (PMC5938372; doi:10.1016/j.cell.2018.03.043), 2018-04-19
Supplement: mmc6.pdf [file mmc6.pdf]

## VHL validation by Sanger sequencing

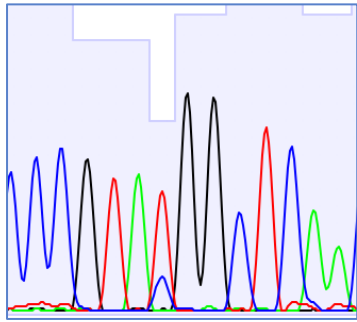

K079 VHL\_3:10183793:T:C

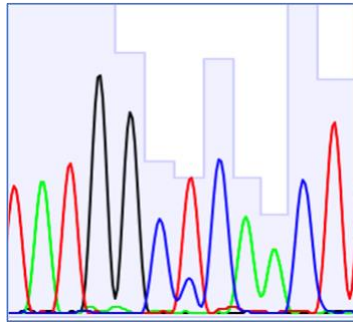

K119 VHL\_3:10183797:T:C

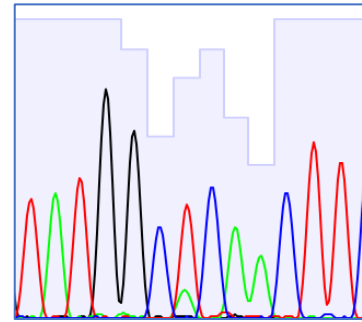

K165 VHL\_3:10183797:T:A

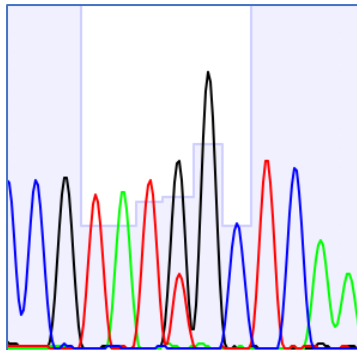

K180 VHL\_3:10183794:G:T

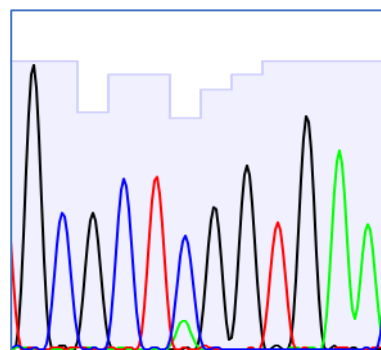

K191 VHL\_3:10183725:C:A

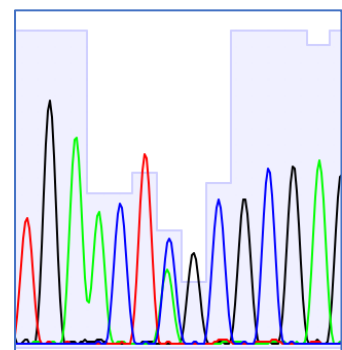

K229 VHL\_3:10183734:C:A

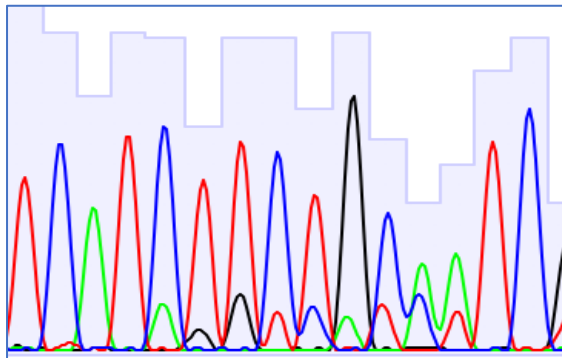

K220 VHL\_3:10183748:10183748:-:AGGTC

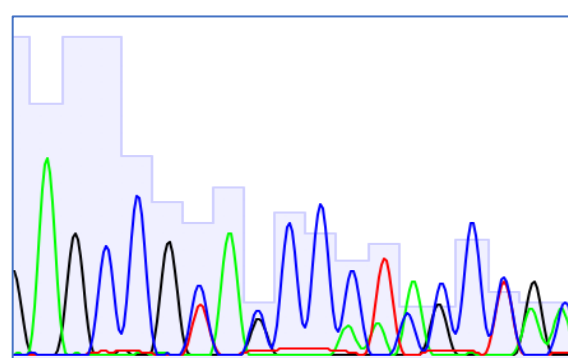

K182 VHL\_3:10183846:10183846:-:GGCCG

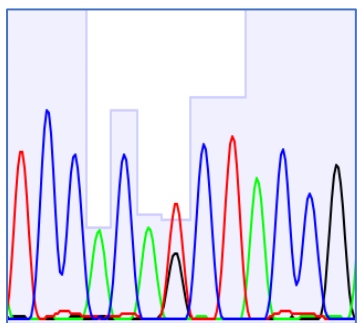

K237 VHL\_3:10183863:G:T

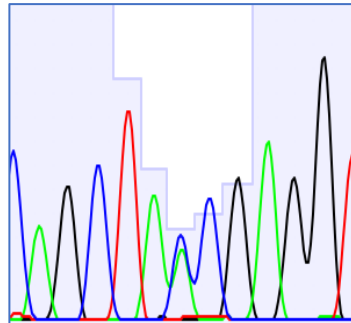

K249 VHL\_3:10183867:C:A

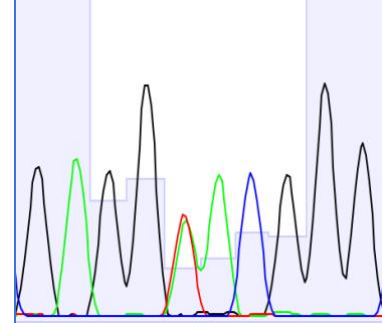

K272 VHL\_3:10183873:T:A

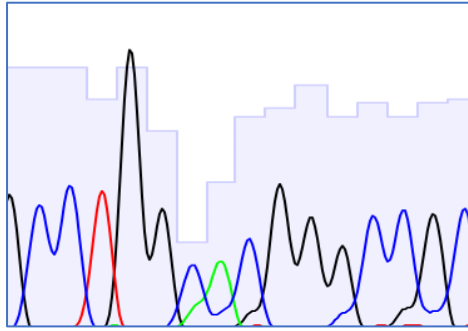

K250 VHL\_3:10183843:10183843:C:-

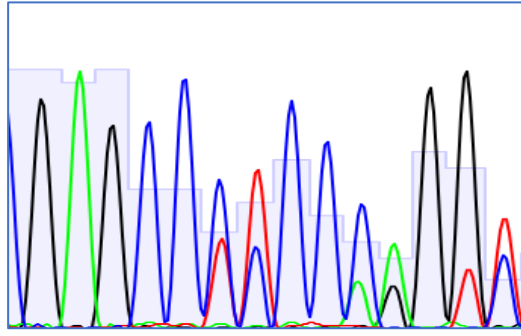

K334\_L VHL\_3:10183742:10183742:C:-

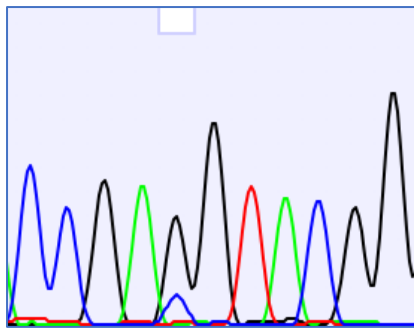

K276 VHL\_3:10183873:T:A

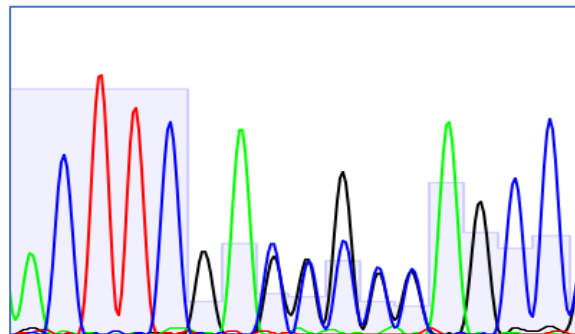

K376 VHL\_3:10183804:10183809:CGACG:-

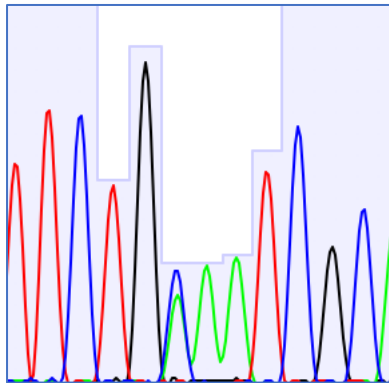

K448 VHL\_3:10183762:C:A

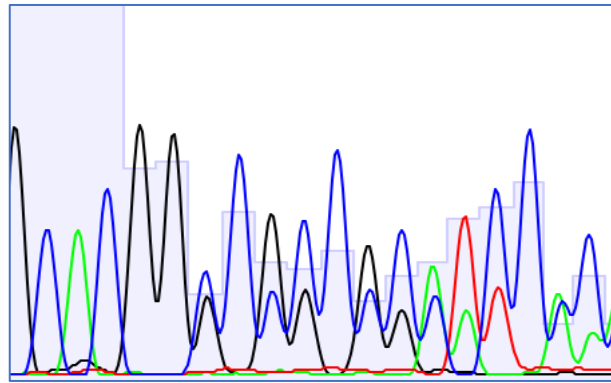

K097\_R VHL\_3:10183846:10183846:G:-

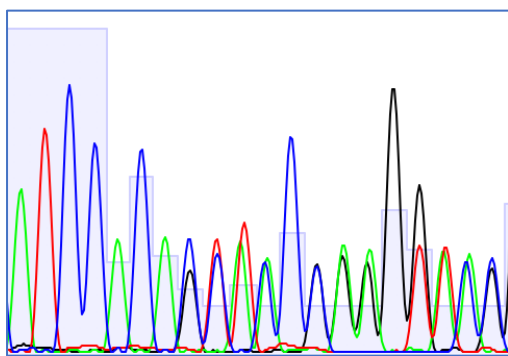

K104 VHL\_3:10183863:10183863:G:-

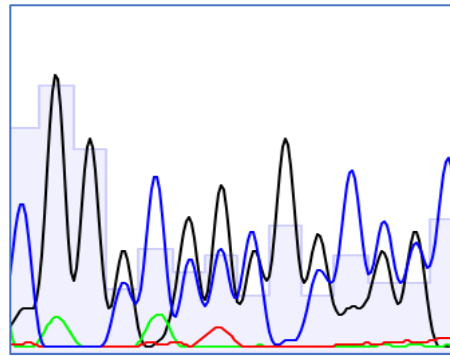

K130 VHL\_3:10183712:10183712:C:-

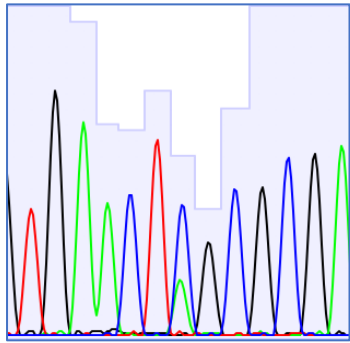

K138 VHL\_3:10183734:C:A

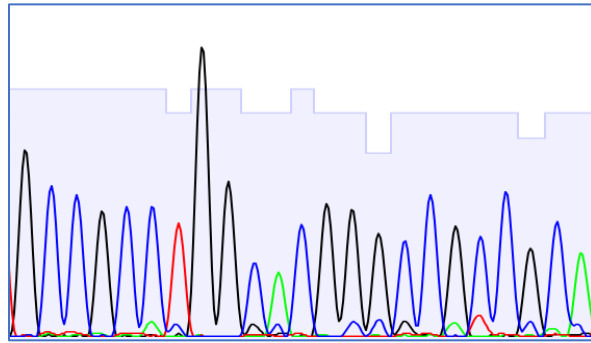

K143 VHL\_3:10183837:10183841:GCCTG:-

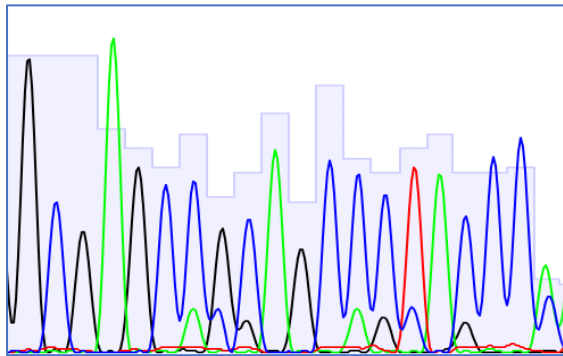

K150 VHL\_3:10183809:10183809:-:CGAGC

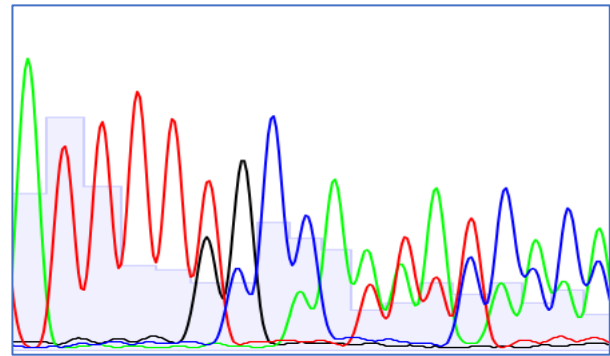

K065 VHL\_3:10188297:10188297:T:-

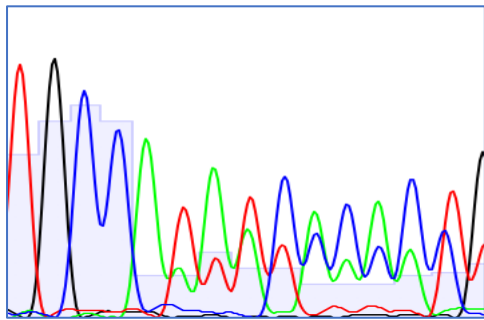

K107 VHL\_3:10188305:10188305:A:-

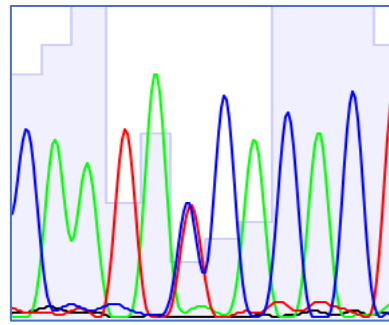

K114 VHL\_3:10188309:T:C

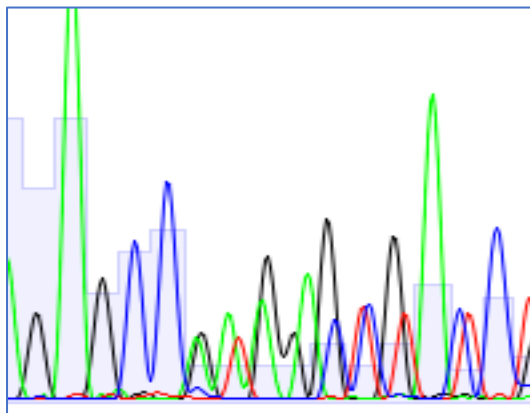

K124 VHL\_3:10188203:10188206:CTTT:-

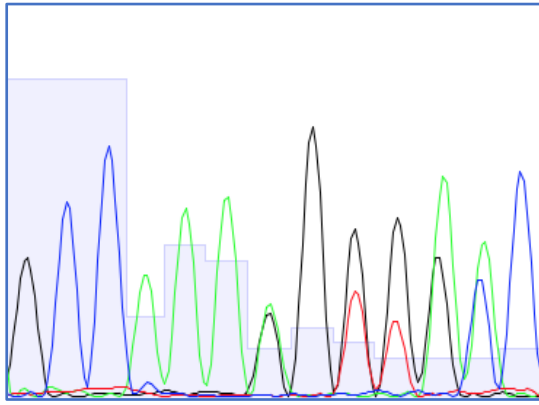

K153 VHL\_3:10188203:10188203:-:T

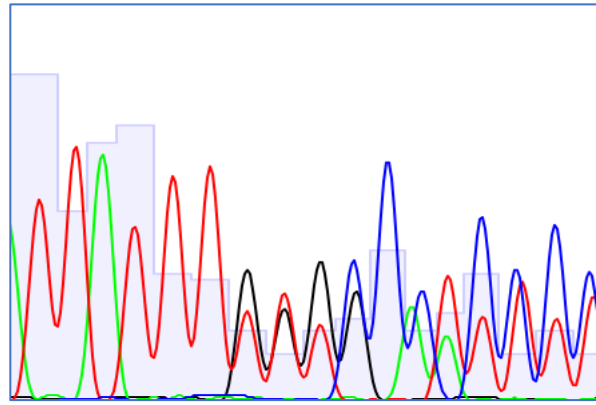

K176 VHL\_3:10188252:10188252:A:-

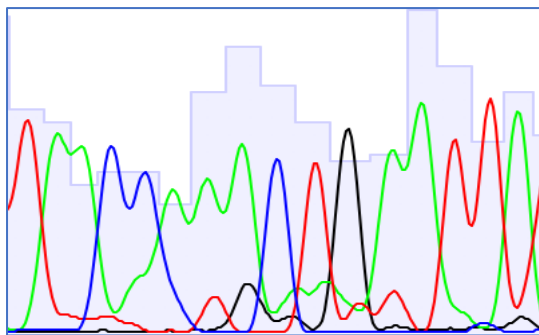

K226 VHL\_3:10188251:10188253:CAA:-

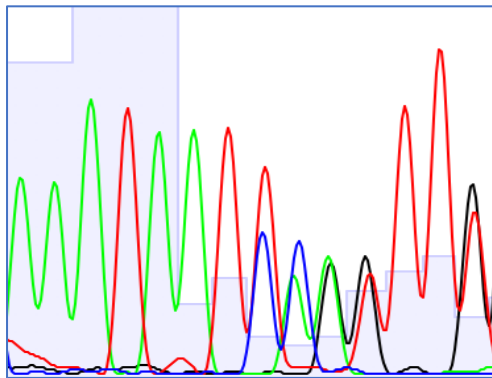

K450 VHL\_3:10188258:10188258:A:-

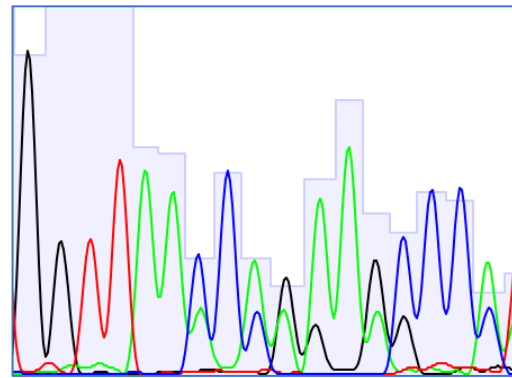

K023 VHL\_3:10188245:10188245:-:T

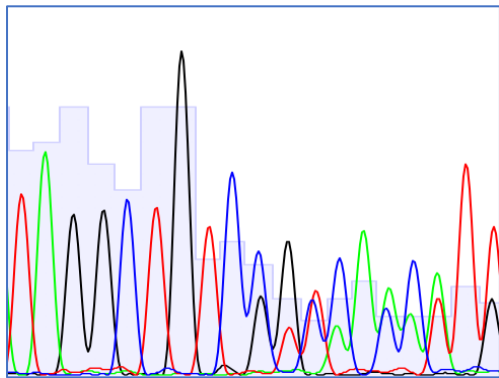

K146 VHL\_3:10188287:10188287:G:-

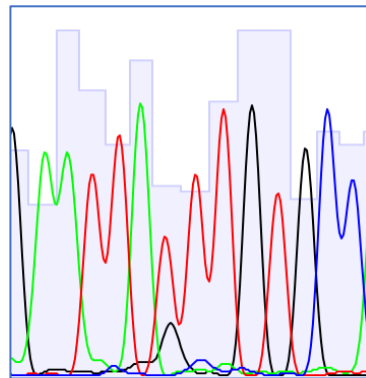

K158 VHL\_3:10188263:T:G

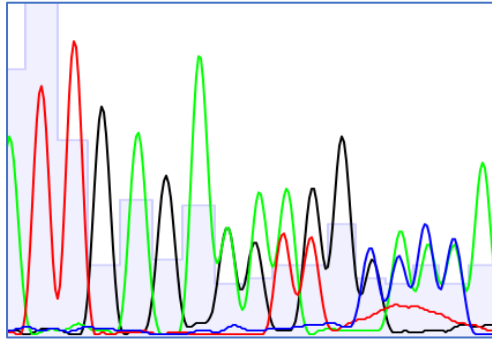

K162 VHL\_3:10188273:10188273:-:T

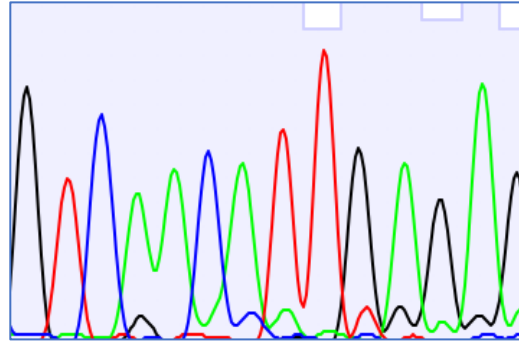

K328 VHL\_3:10188283:10188283:-:C

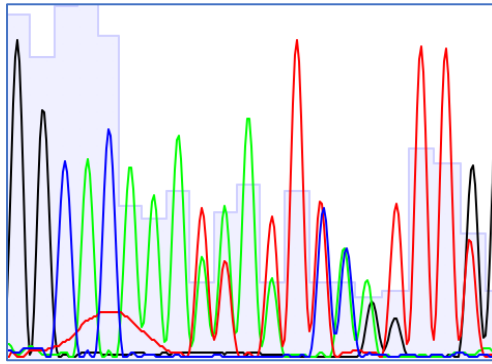

K263 VHL\_3:10188262:10188262:-:T

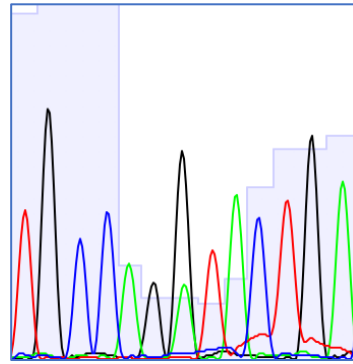

K265 VHL\_3:10188321:10188321:-:G:A

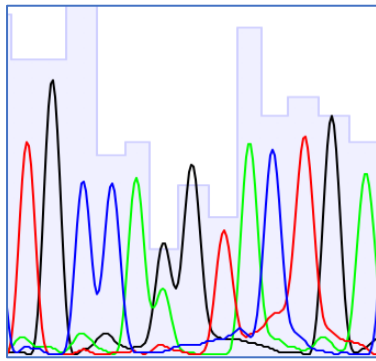

K306 VHL\_3:10188320:10188320:-:G:A

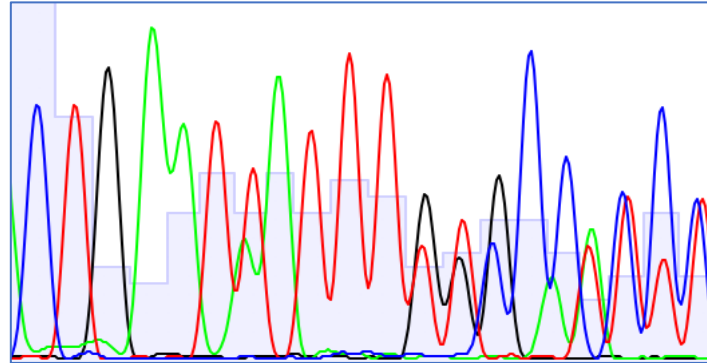

K323 VHL\_3:10188266:10188266:-:G:-

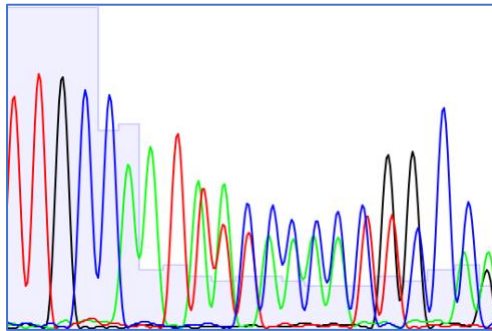

K386 VHL\_3:10188306:10188306:-:T

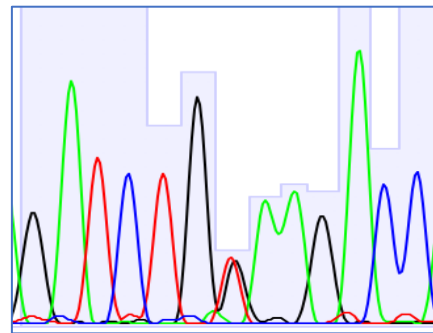

K059 VHL\_3:10191572:10191572:-:G:T

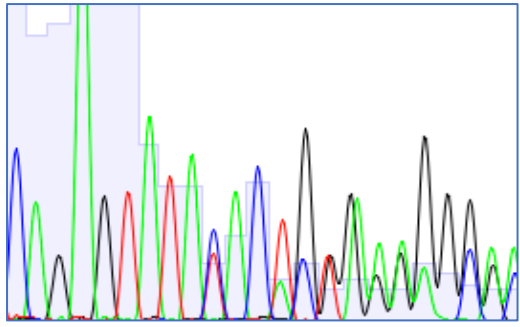

K123 VHL\_3:10191472:10191472:-:TA

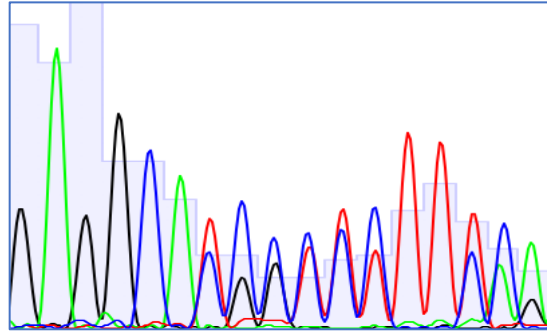

K136 VHL\_3:10191490:10191490:A:-

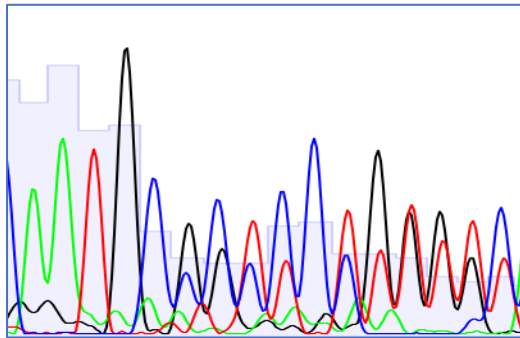

K234 VHL\_3:10191620:10191620:-:G

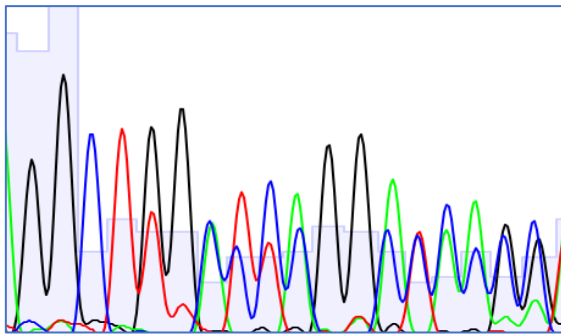

K243 VHL\_3:10191513:10191518:TAGTC:-

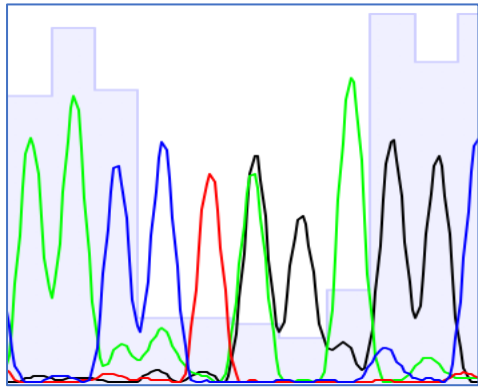

K252 VHL\_3:10191497:C:T

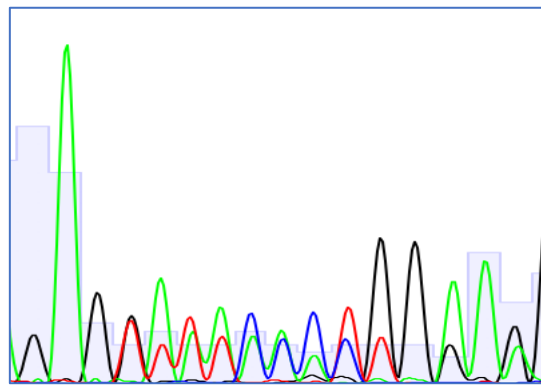

K352 VHL\_3:10191476:10191476:-:C

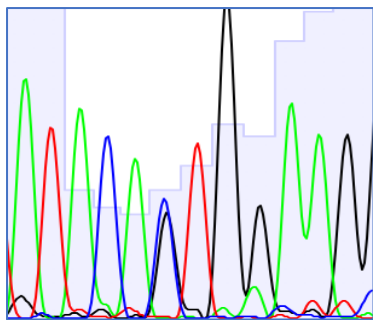

K360 VHL\_3:10191470:G:C

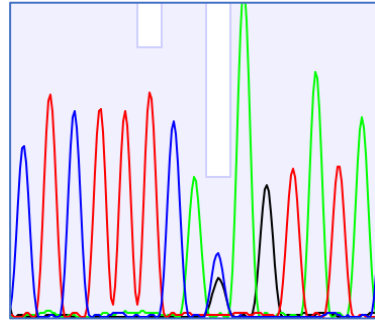

K520 VHL\_3:10191479:C:G

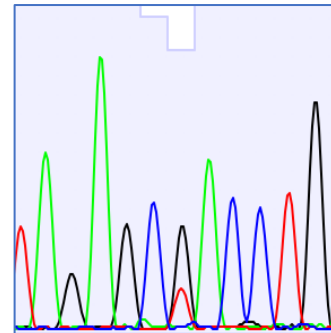

K523 VHL\_3:10191555:C:A



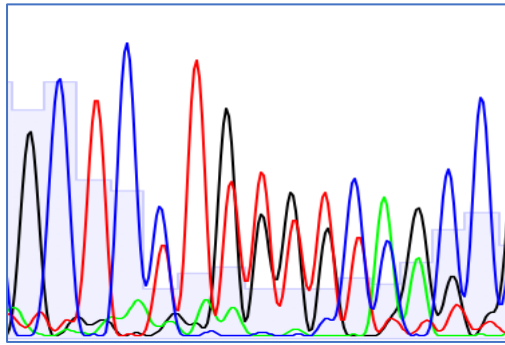

K027 VHL\_3:10191614:10191614:-:A

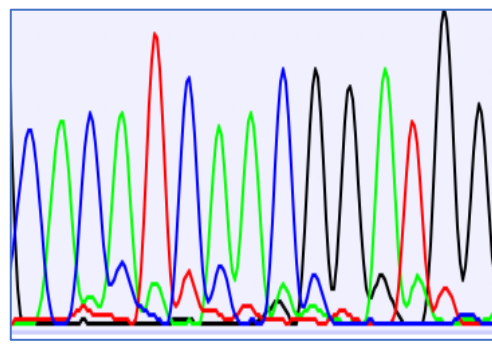

K032 VHL\_3:10191627:10191627:-:A

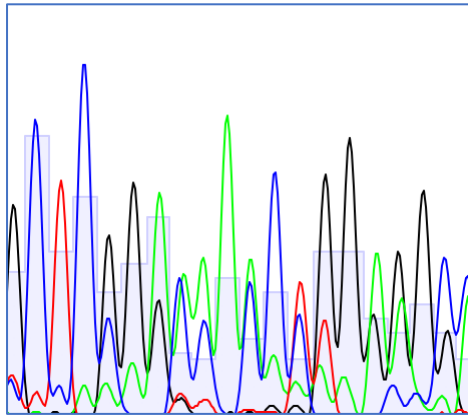

K099 VHL\_3:10191507:10191507:G:-

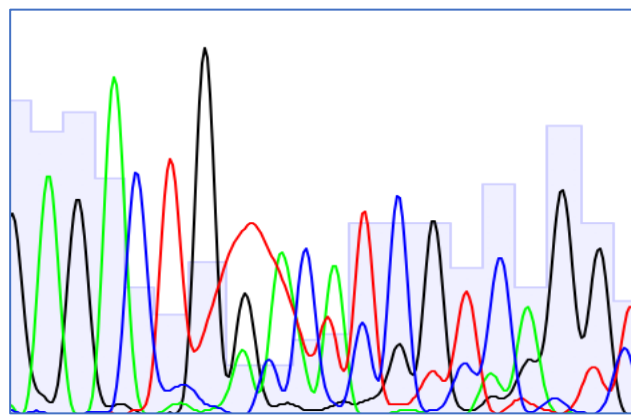

K128 VHL\_3:10191541:10191541:G:-

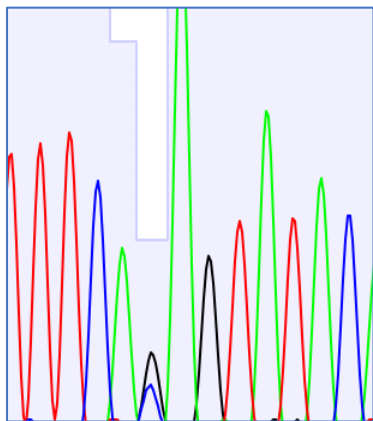

K167 VHL\_3:10191479:C:G

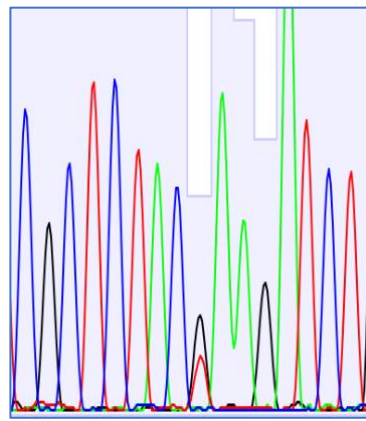

K207 VHL\_3:10191563:G:T

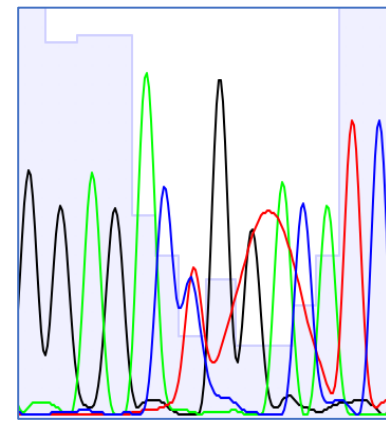

K208 VHL\_3:10191540:T:C

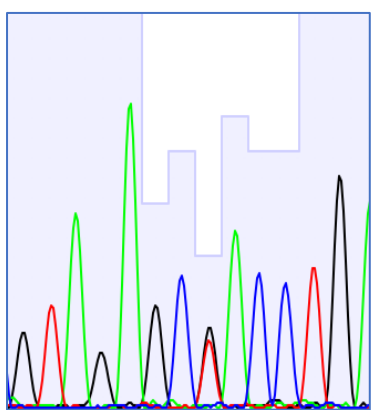

K242 VHL\_3:10191555:C:A

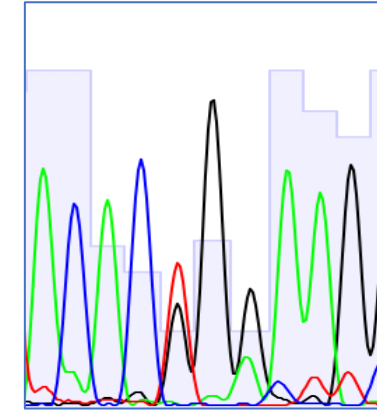

K245 VHL\_3:10191469:A:C

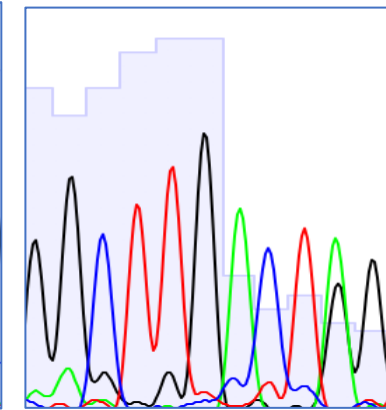

K265 VHL\_3:10191513:T:C

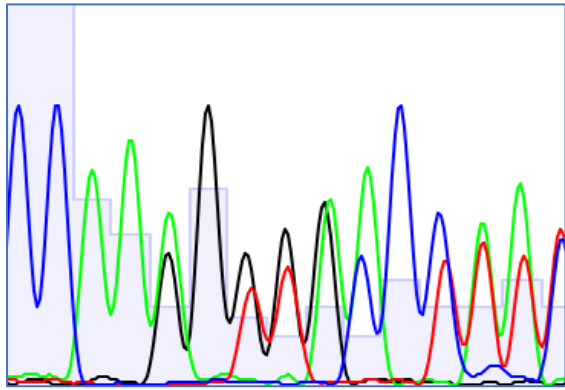

K256 VHL\_3:10188204:10188204:T:-

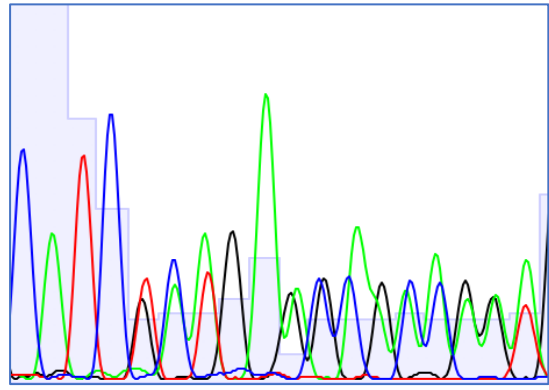

K334 VHL\_3:10188215:10188217:AGA:-

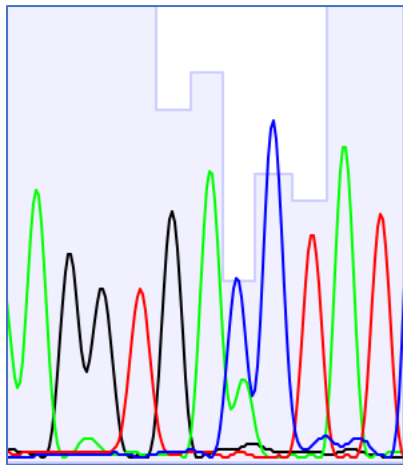

K352 VHL\_3:10188198:G:T

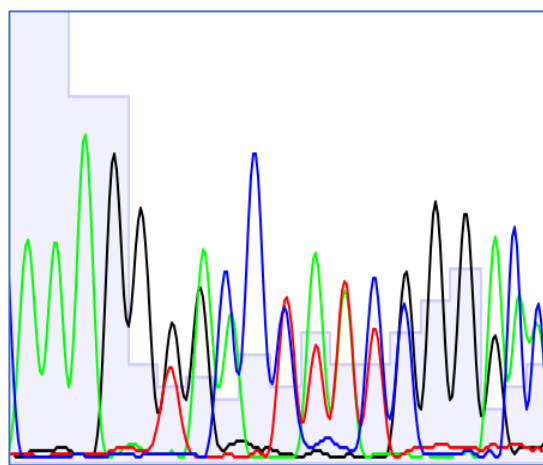

K375 VHL\_3:10188201:10188201:A:-

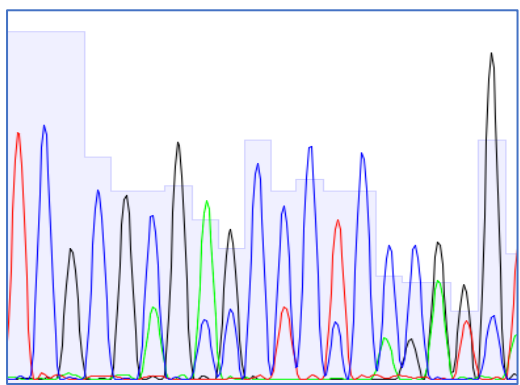

K039 VHL\_3:10183734:10183735:CG:-

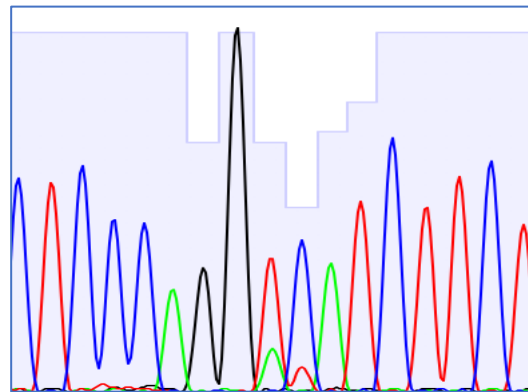

K156 VHL\_3:10183752:10183753:TC:AT

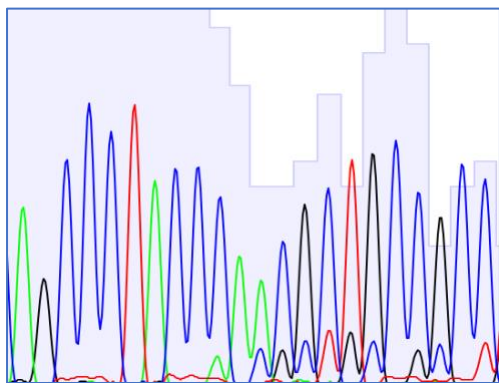

K326 VHL\_3:10183825:10183825:C:-

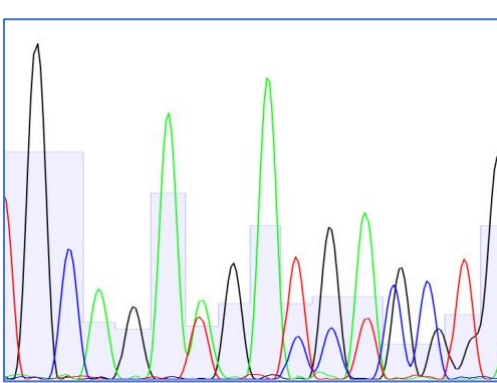

K184 VHL\_3:10183755:10183757:TCT:-



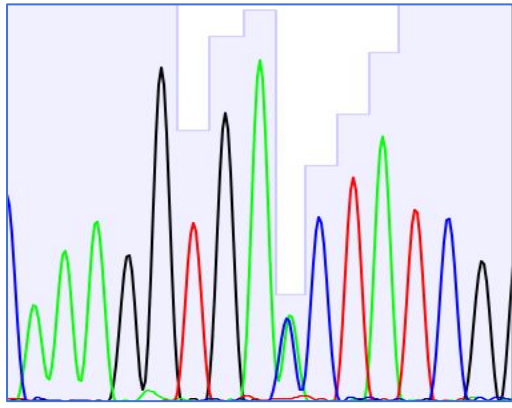

K216 VHL\_3:10188198:G:T

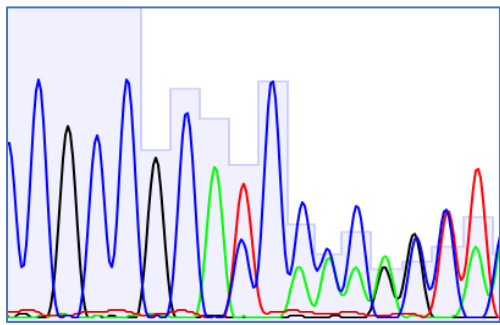

K217 VHL\_3:10183857:10183857:T:-

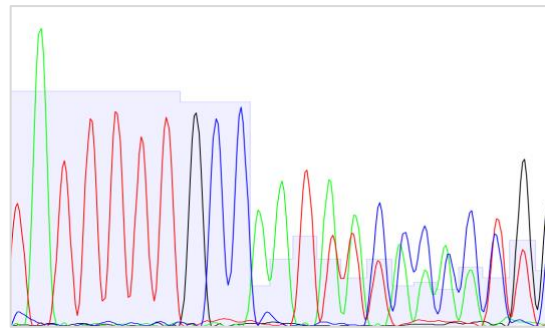

K386 VHL\_3:10188306:10188306:-:T

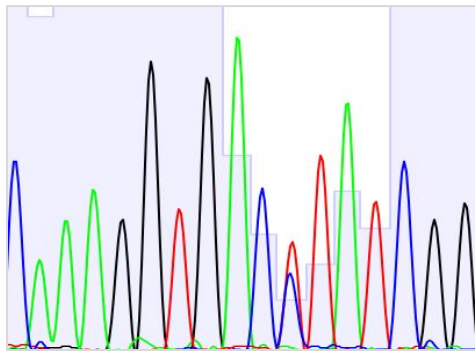

K118 VHL\_3:10188197:G:A

# VHL methylation Profiles

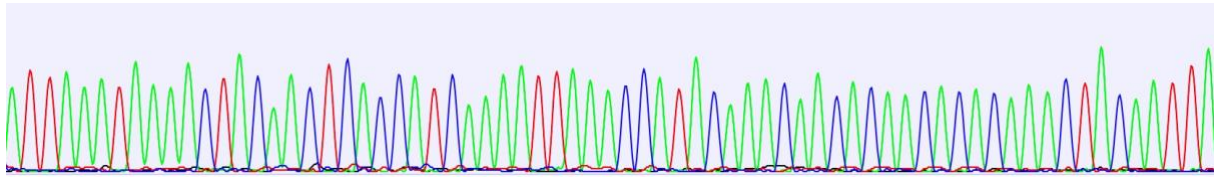

K064\_N

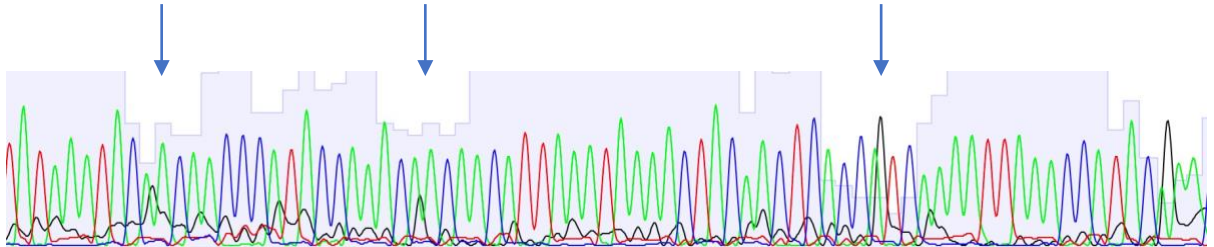

K064\_R1

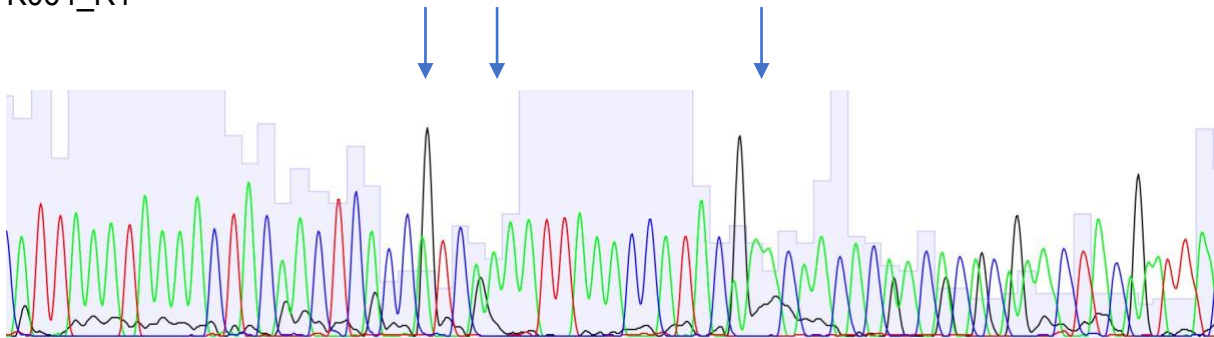

K064\_R2

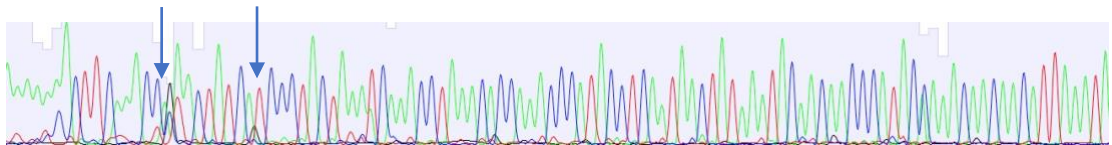

K222\_R2

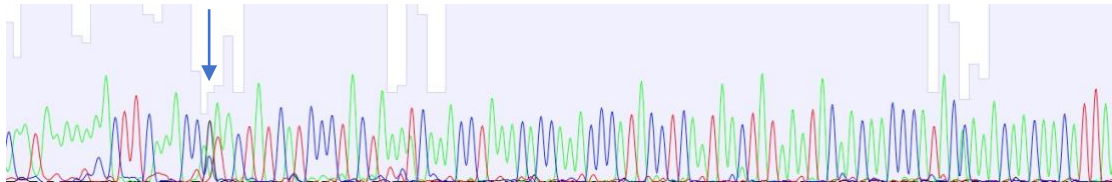

K222\_R3

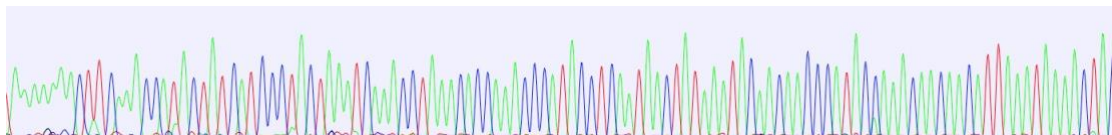

K222\_N

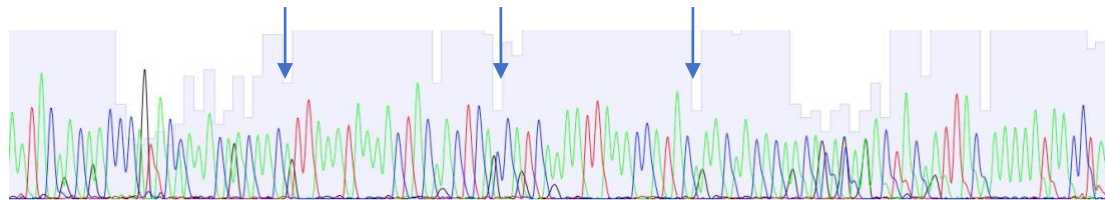

K233\_R3

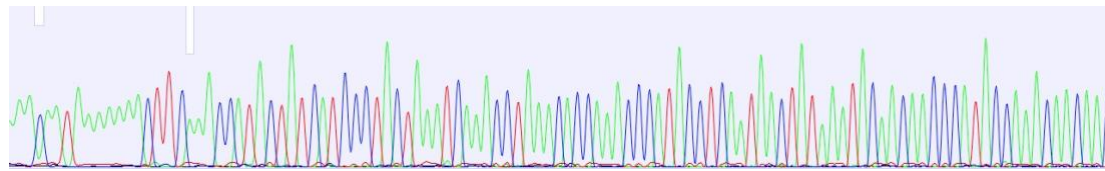

K233\_N

90 100 110 120  
 T G G G T C G T T G T A T T T A T A G T T A T T G A G G T A T G G G T T C G G C G T T T A G G

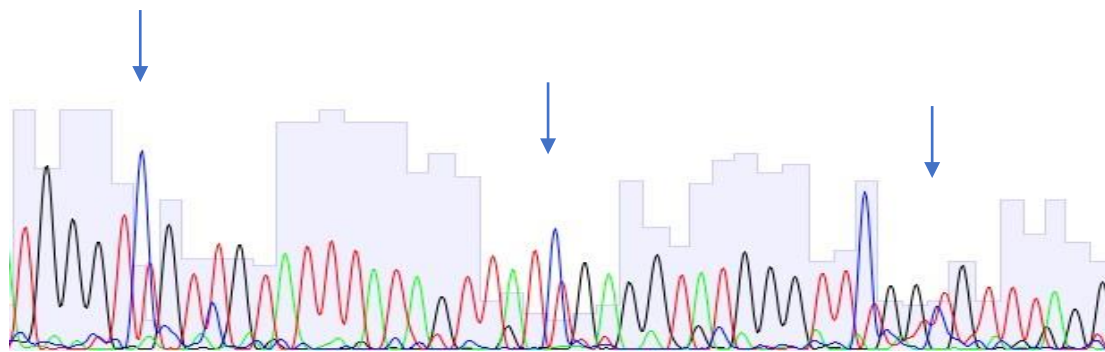

K239\_R3

80 90 100 110  
 T G G G T T G T T G T A T T T A T A G T T A T T G A G G T A T G G G T T T

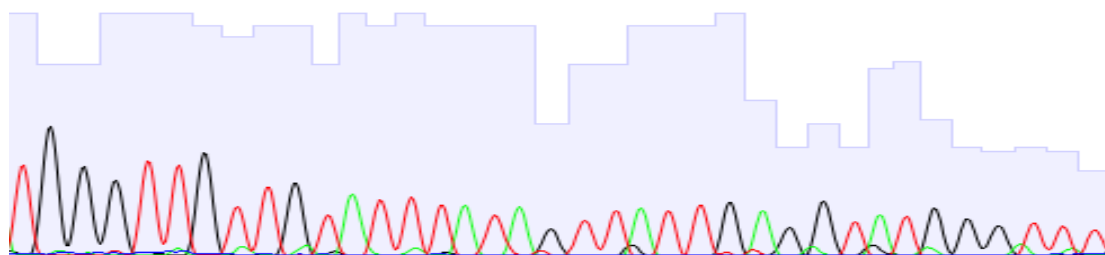

K239\_N



130 140 150 160 170  
G G T T T G A T T T A G T A G G G A C G A T A G T A C G G T T T G A A G T T T T T T A T T G T T T T G G G G !

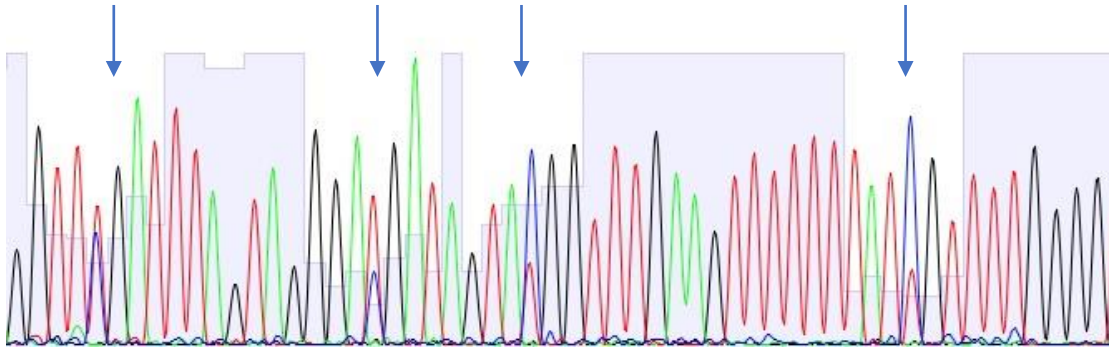

K379\_R22

120 130 140 150 160 170 180 190  
G C G T T T G A T T T A G T A G G G A T G A T A G T A C G G T T T G A A G T T T T T T A T T G T T T T G G G G T T T A T T T T G T A G A T G G G G

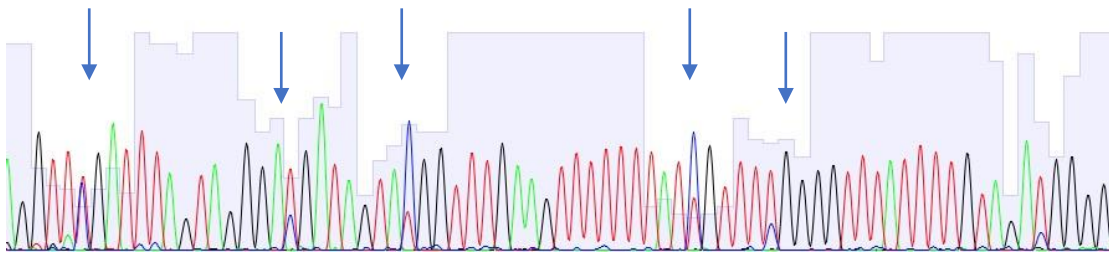

K379\_R23

30 40 50 60 70 80 90 100  
C A A A A C A G T A A A A A A A C T T C A A A C C A T A C T A T C A T C C C T A C T A A A T C A A A C C T A A A C A C C A A A C C C A T A C C T C A A

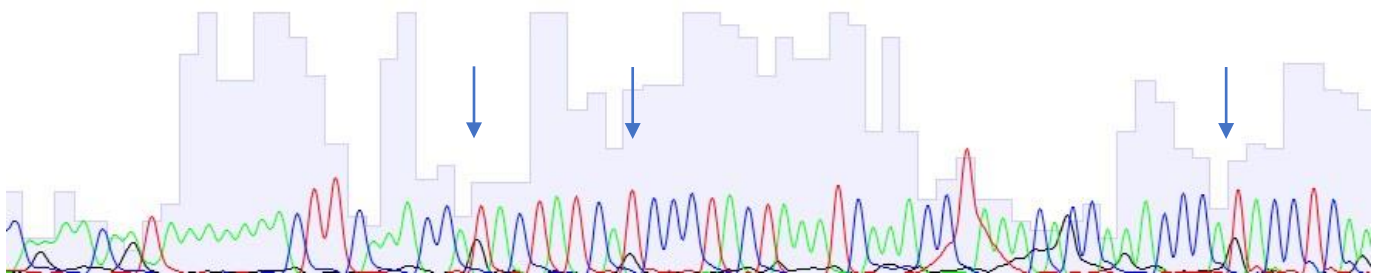

K163\_Tumour



30 40 50 60 70 80 90  
A C C C C A A A A C A A T A A A A A A A C T T C A A A C C A T A C T A T C A T C C C T A C T A A A T C A A A C C T A A A C A C C A A A C C C A

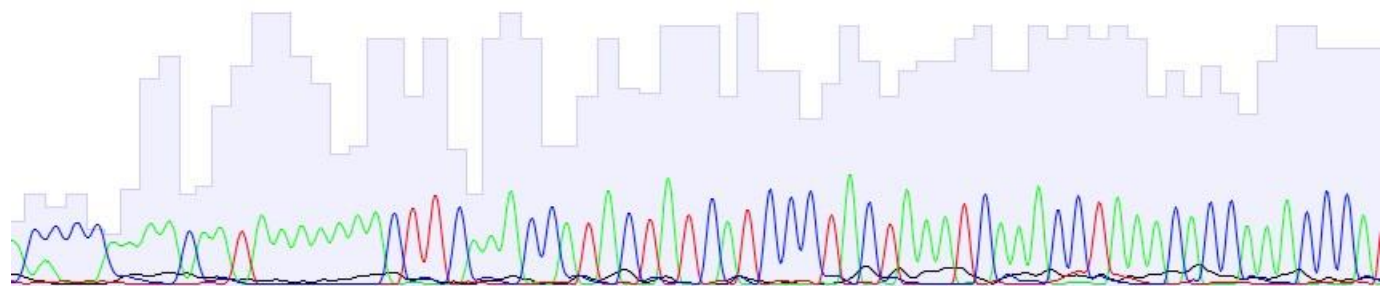

K163\_N

80 90 100 110  
T G G G T T G T T G T A T T T A T A G T T A T T G A G G T A T T G G G

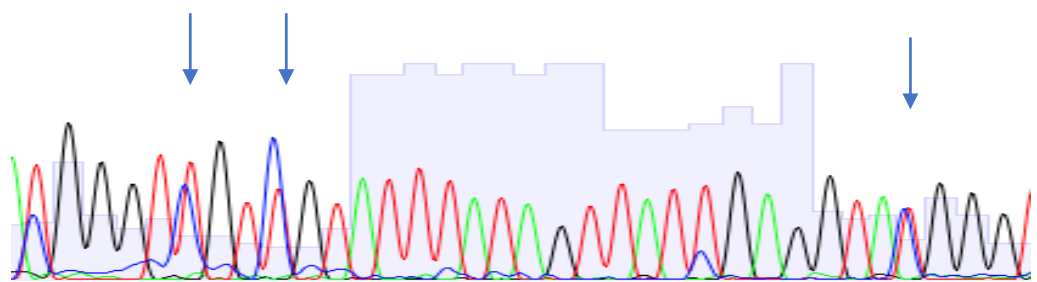

K029\_R3

90 100 110 120  
G G G T C T G T C T G T A T T T A T A G T T A T C T G A G G T A C T G G G

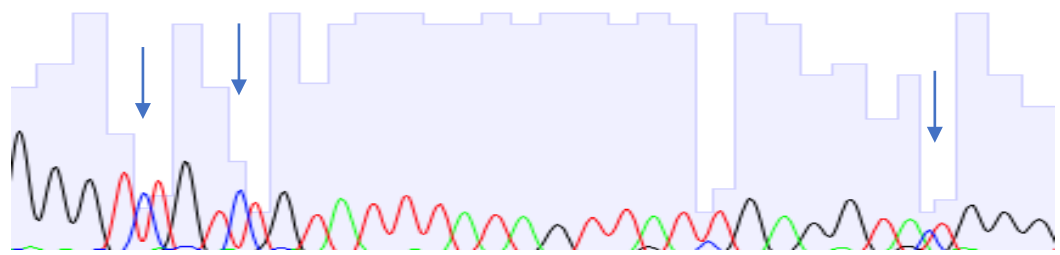

K029\_R9



80 90 100 110  
T G G G T T G T T G T A T T T A T A G T T A T T G A G G T A T G G G

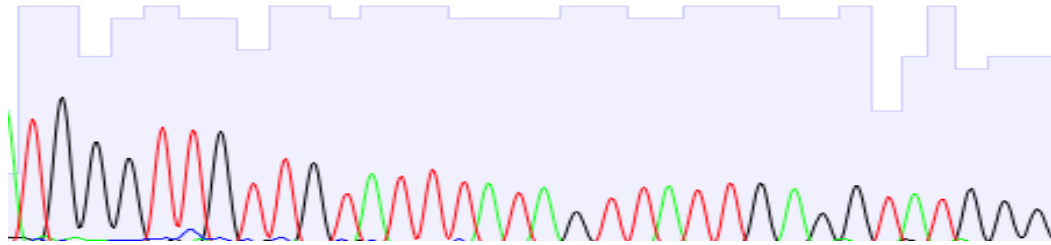

K029\_N

140 150 160 170 180 190  
A A A T A A A A C T A C G A C T C G C C G C C G A A T T A A A C C C T A A C G A C C A A A C C C G A C G C G C G

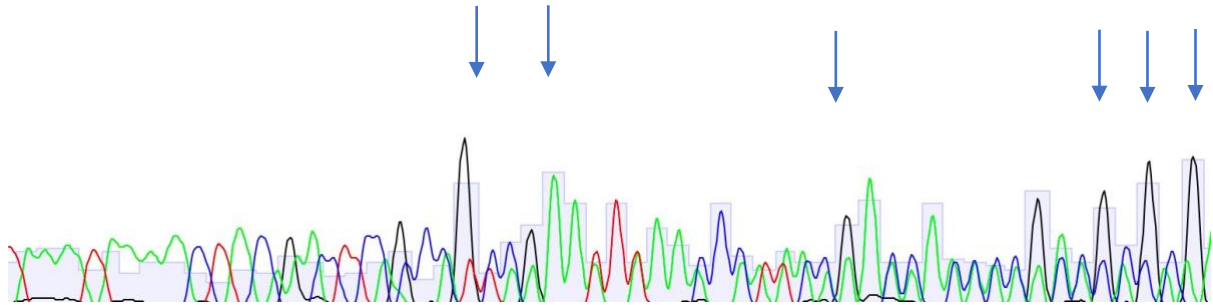

K070\_R4

150 160 170 180 190  
A A A T A A A A C T A C A C T C C C C C G C C G A A T T T A A C C C T A A C G A C C A A C C C G A C G C G C G

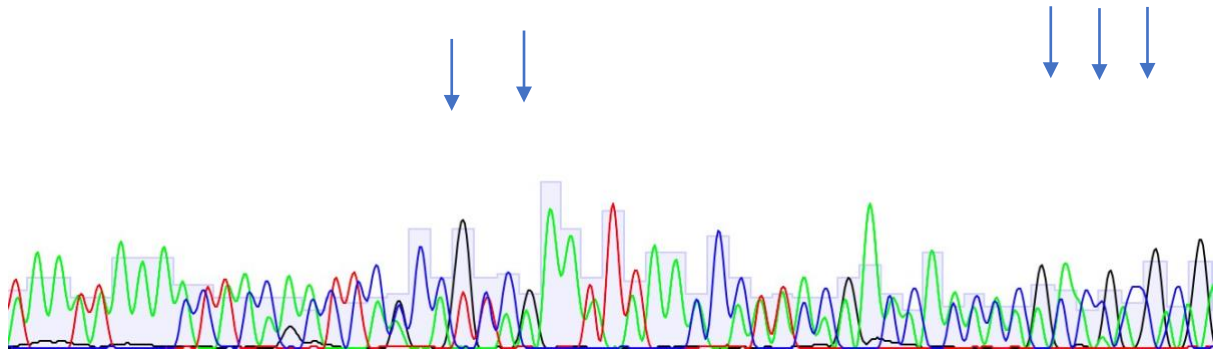

K070\_R9

40 150 160 170 180 190 200  
A A A T A A A A C T A C A A C T C A C C A T C A A A A T T A A A C C A T A C A A A C A A C A C A A C A C A A A C T A C ;

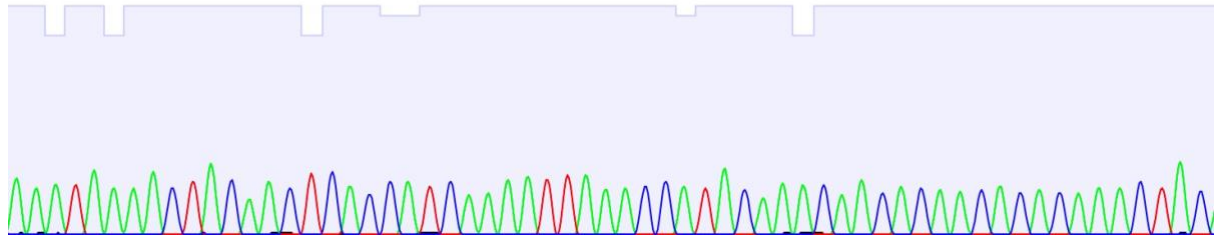

K070\_N

140 150 160 170 180 190 200  
G G T T T G A T T T A C T A G G G A C G A T A G T A C G G T T T G A A G T T T T T A T C G T T T T G G G T T T A T T T T G T A G A C G G G G .

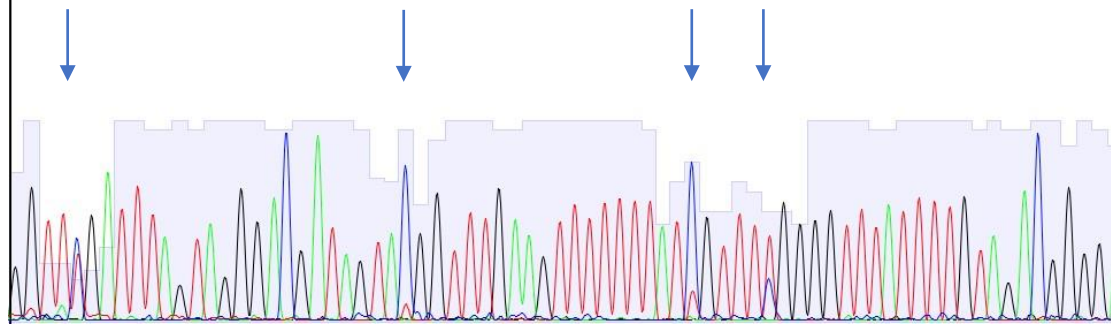

K098\_R1

110 120 130 140 150 160 170  
G G G T T T G G T G T T A G G T T T G A T T T A G T A G G G A C G A T A G T A C G G T T T G A A G T T T T T T A T T G T T T T G G G G T

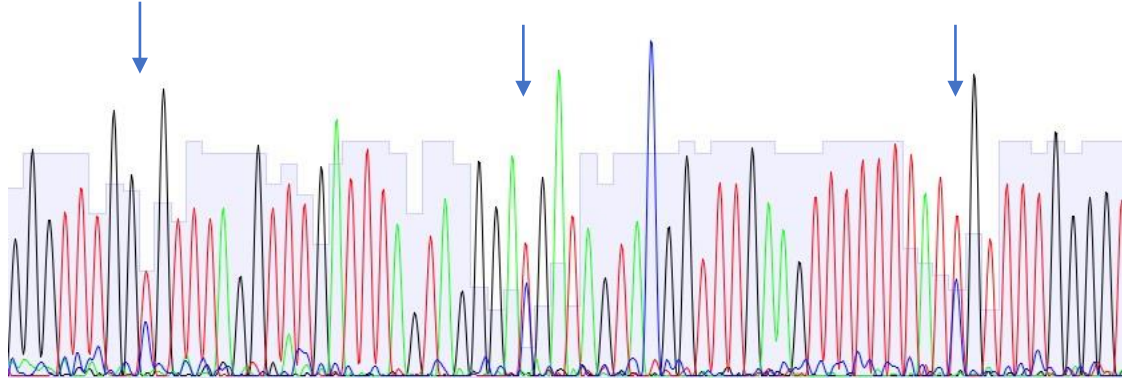

K108\_R3

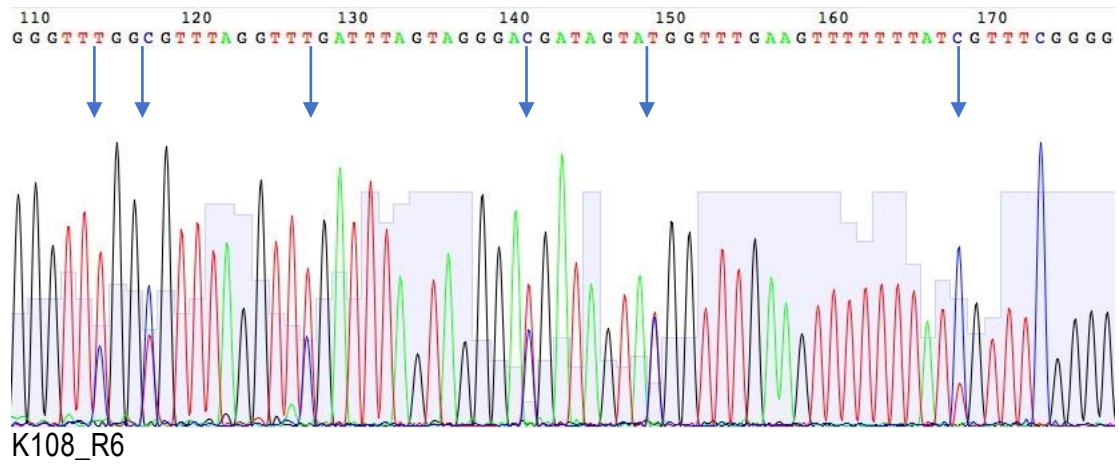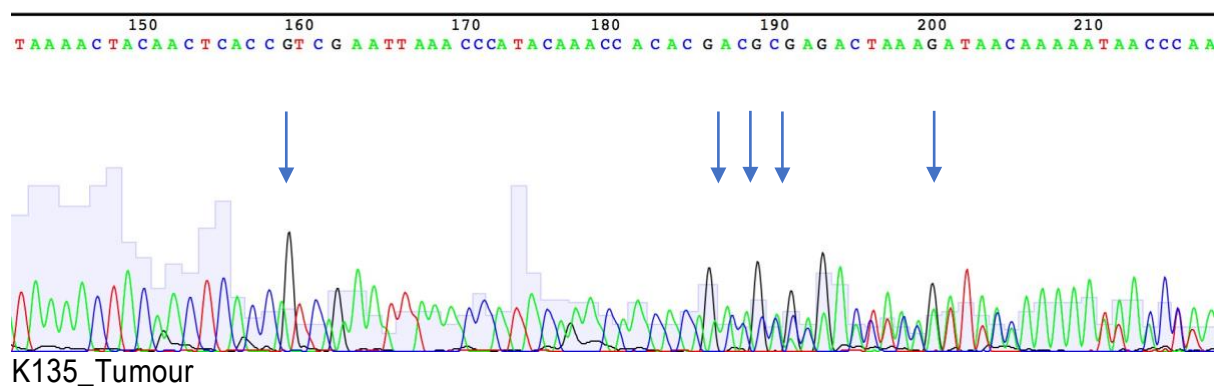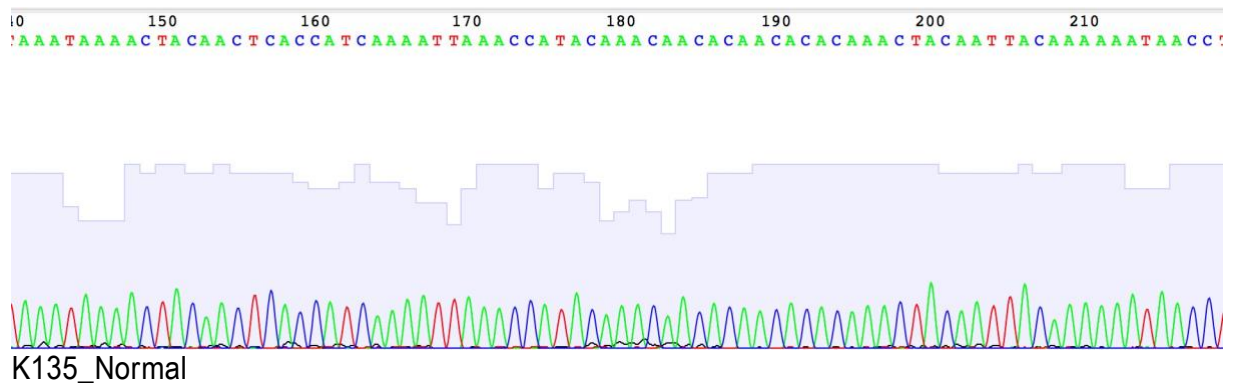

130 140 150 160 170 180  
T T G A T T T A G T A G G G A T G A T A G T A C G G T T G A A C T T T T T T A T T C T T T G G G C T T A T T T T G T

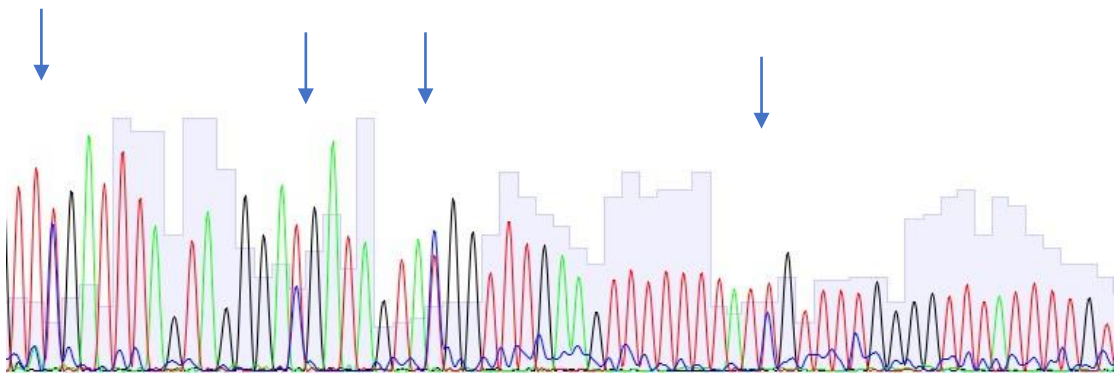

K177\_R2

30 140 150 160 170 180 190  
T T G A T T T A G T A G G G A T G A T A G T A T G G T T T G A A G T T T T T T A T C G T T T T G G G G T T T A T T T T G T A

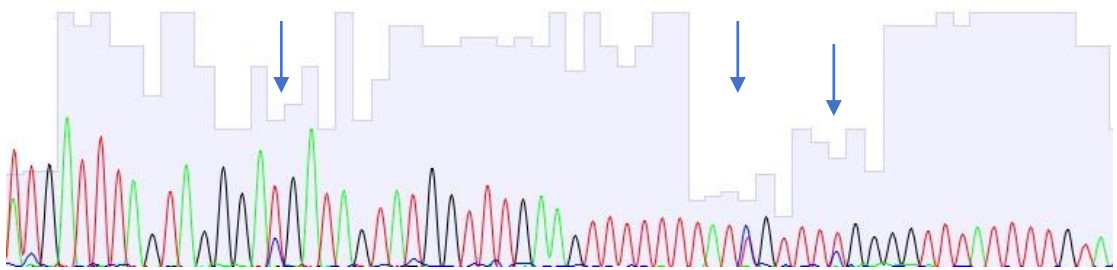

K177\_R4

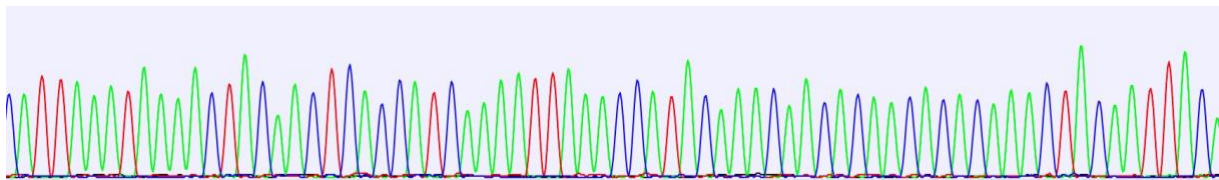

K304\_N

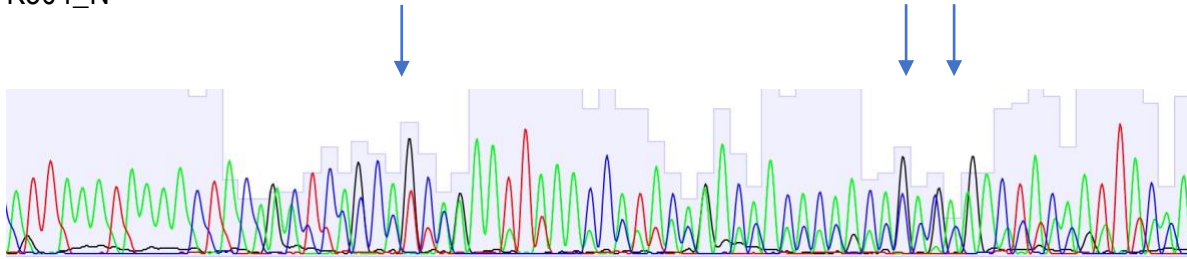

K304\_R3



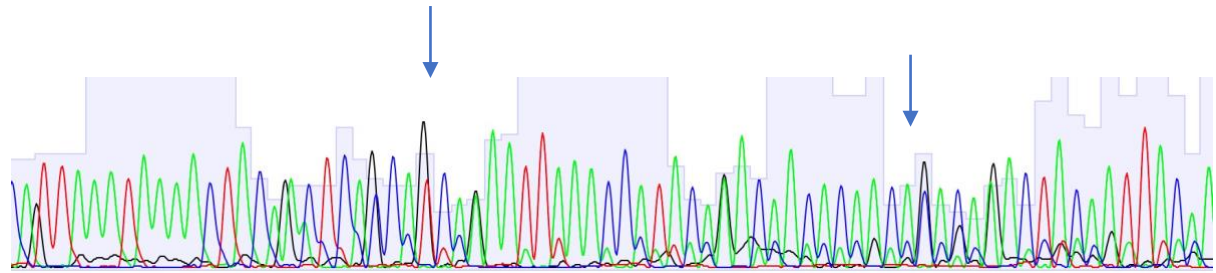

K304\_R4

80 90 100 110 120 130  
 A A A C G C C A A A C C C C G T A C C T C A A T A A C T A T A A A T A C A A C A C C C A T A C C A A A C

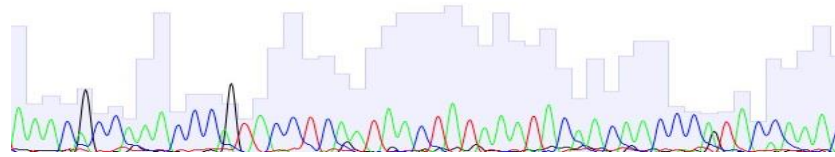

K308\_R2

80 90 100 110 120 130  
 T A A A C C C C A A A C C C C G T A C C T C A A T A A C T A T A A A T A C A A C A A C C C A T A C A A A A A

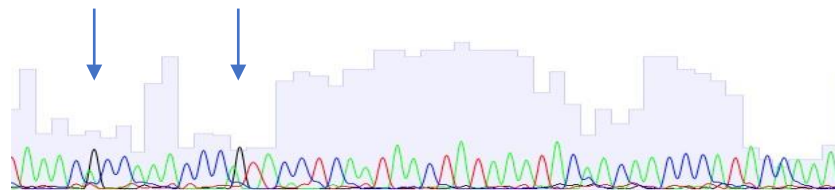

K308\_R3

80 90 100 110 120 130  
 T A A A C A C C A A A C C C A T A C C T C A A T A A C T A T A A A T A C A A C A A C C C A T A C C A A A A

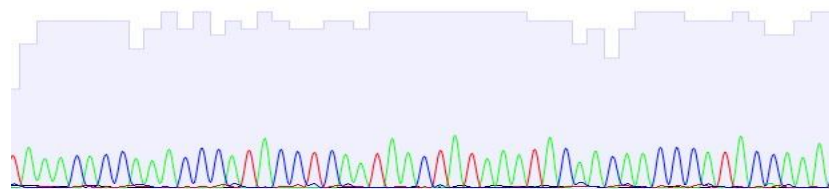

K308\_N

110 120 130 140 150 160 170 180 190 200  
 A G G T A C G G G T T C G G C C T T T A G G T T C G A T T T A G T A G C G C A C G A T A G T A C G C T T T C A A G T T T T T A T C G T T T C G G G T T T A T T T G T A C A C C G G G A A

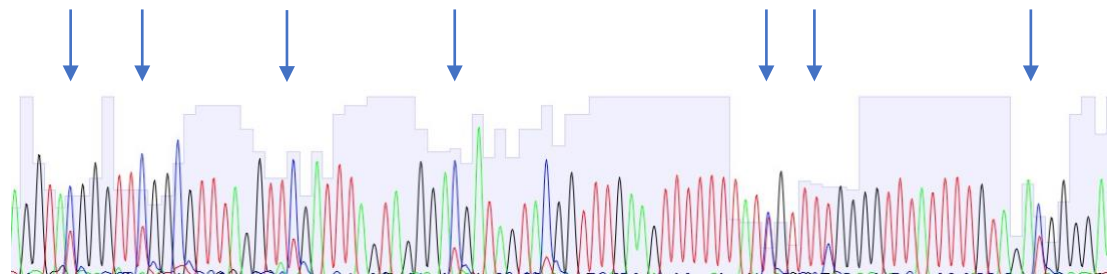

K463\_R8

110 120 130 140 150 160 170 180  
 GGTACGGCTTTGGCGTTTAGCTTTGATTTAGTAGCGGACGATAGTATGCTTTGAA GTTTTATTCGTTTCGGGGT

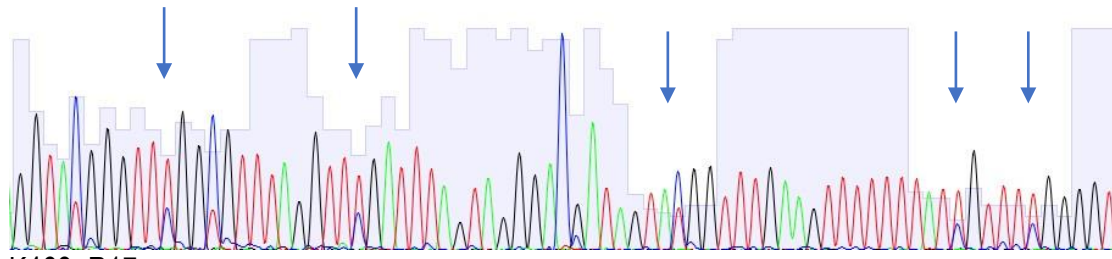

K463\_R17

140 150 160 170 180 190 200  
 GTAGGGACGATAGTATGGTTTGAAGTTTTTTATTCGTTTCGGGGTTATTTTGTAGACGGGGAAATTGAGG'

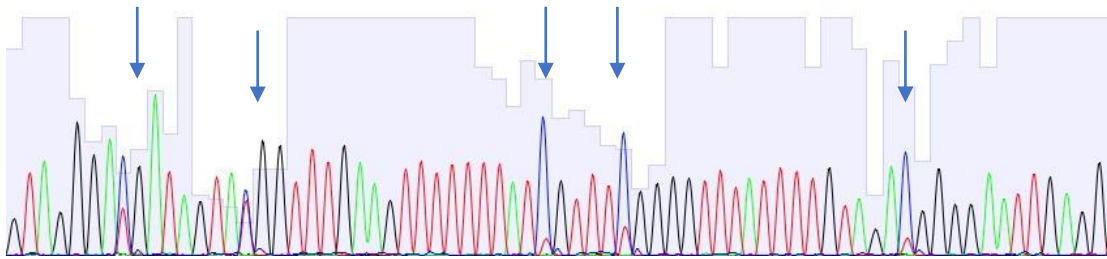

K463\_R3

Sanger sequence trace of the VHL INDEL identified in the right kidney tumour of patient K097 and VHL methylation in the left kidney tumour.

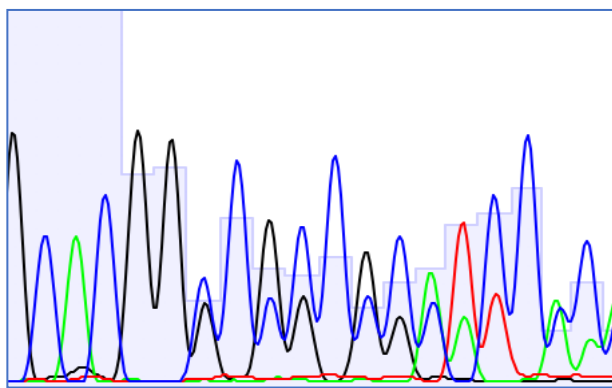

K097\_Right Kidney VHL\_3:10183846:10183846:G:-



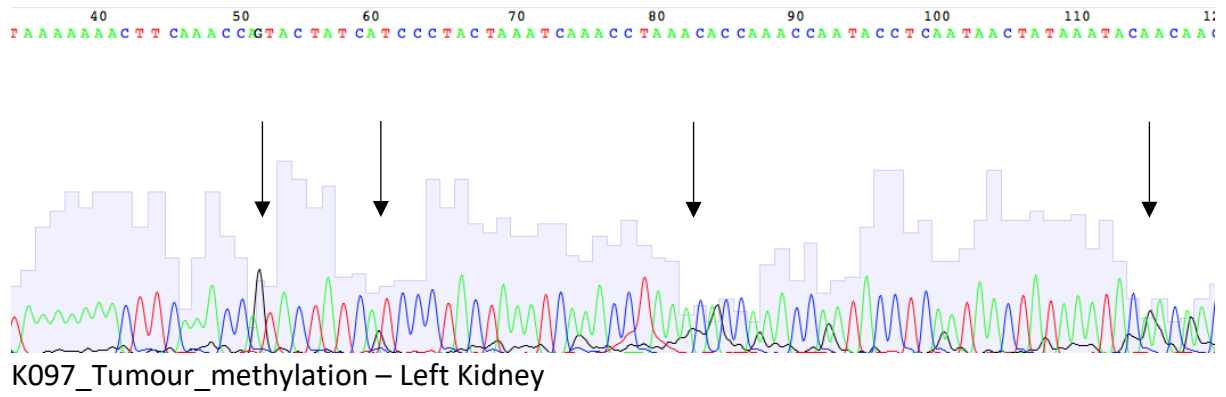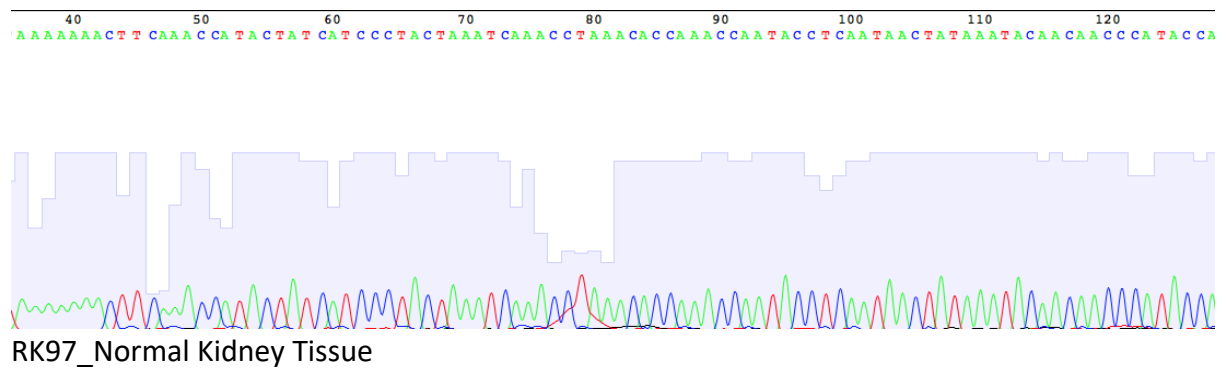

### VHL mutations in left K150 tumours (historical)

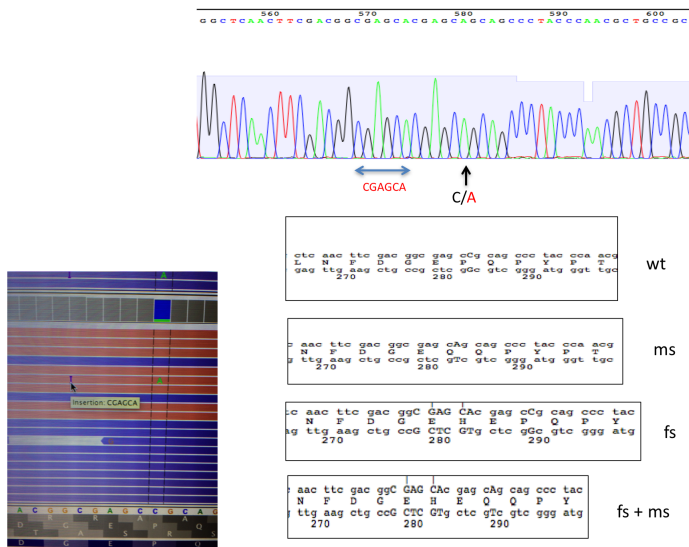

### Oligonucleotide sequences for VHL exon amplification and methylation specific PCR

| Oligonucleotide name | Oligonucleotide Sequence 5'-3' |
|----------------------|--------------------------------|
| VHL_X1_F             | gtggaatacacgtaacgagttgg        |
| VHL_X1_R             | caggcaaaaattgagaactgg          |
| VHL_X2_F             | aaccttggcttgtcccgata           |
| VHL_X2_R             | caggcaaaaattgagaactgg          |
| VHL_X3a_F            | ctgccactgaggatttggtt           |
| VHL_X3a_R            | ccatcaaaagctgagatgaaa          |
| VHL_methylation_1F   | gagtttttttaggttatttttgaat      |
| VHL_methylation_1R,  | tcacctaaatatatcctacctcaaaa     |
| VHL_methylation_2F   | ccctctaaaatttaatatTTTT         |
| VHL_methylation_2R   | ggttaaggtttagtgagttaagtt       |
