# Supplementary material for: Deterministic Evolutionary Trajectories Influence Primary Tumor Growth: TRACERx Renal
Source: PubMed Central journal article supplement (PMC5938372; doi:10.1016/j.cell.2018.03.043), 2018-04-19
Supplement: mmc7.pdf [file mmc7.pdf]

K255

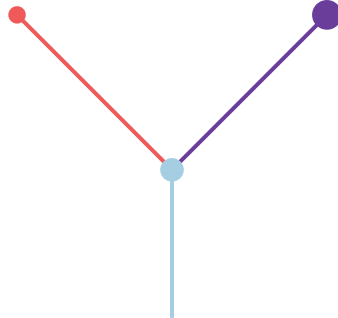

| ID           | Type          | R7 | R6 | R10 | R12 | R11 | R13 | R3 |
|--------------|---------------|----|----|-----|-----|-----|-----|----|
| <b>PTEN</b>  | <b>SNV</b>    |    |    |     |     |     |     |    |
| <b>SYNE2</b> | <b>synSNV</b> |    |    |     |     |     |     |    |
| <b>5</b>     | <b>GAIN</b>   |    |    |     |     |     |     |    |
| <b>16p</b>   | <b>GAIN</b>   |    |    |     |     |     |     |    |
| <b>AKT2</b>  | <b>SNV</b>    |    |    |     |     |     |     |    |
| <b>3p</b>    | <b>LOSS</b>   |    |    |     |     |     |     |    |
| <b>10p</b>   | <b>LOSS</b>   |    |    |     |     |     |     |    |
| <b>19q</b>   | <b>LOSS</b>   |    |    |     |     |     |     |    |
| <b>22q</b>   | <b>LOSS</b>   |    |    |     |     |     |     |    |

| ID           | Type          | R7 | R6 | R10 | R12 | R11 | R13 | R3 |
|--------------|---------------|----|----|-----|-----|-----|-----|----|
| <b>17q</b>   | <b>GAIN</b>   |    |    |     |     |     |     |    |
| <b>17p</b>   | <b>GAIN</b>   |    |    |     |     |     |     |    |
| <b>16q</b>   | <b>GAIN</b>   |    |    |     |     |     |     |    |
| <b>14q</b>   | <b>LOSS</b>   |    |    |     |     |     |     |    |
| <b>KDM5D</b> | <b>synSNV</b> |    |    |     |     |     |     |    |



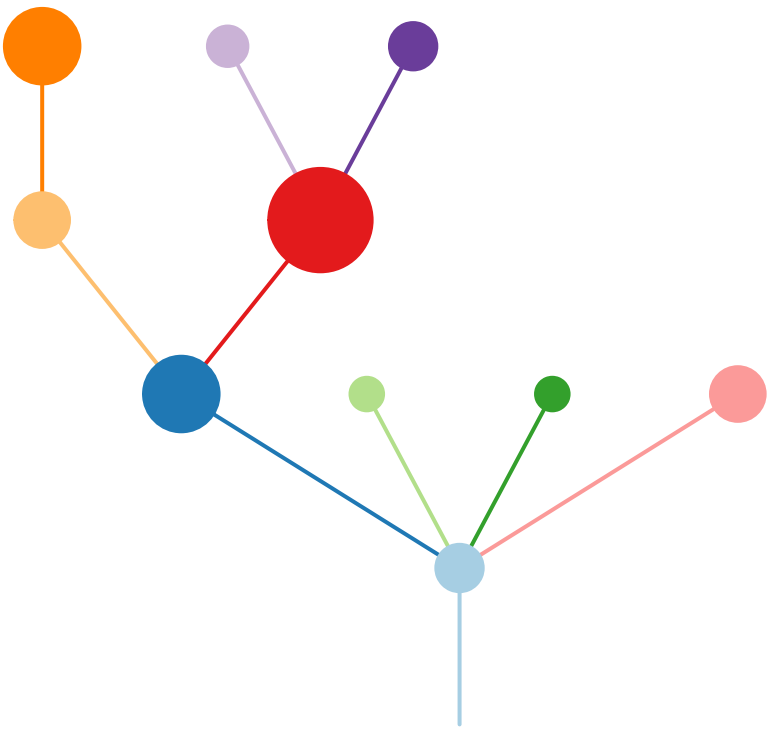

| ID     | Type   | R1 | R5 | R10 | R9 | R4 | R3 | R8 |
|--------|--------|----|----|-----|----|----|----|----|
| VHL    | SNV    |    |    |     |    |    |    |    |
| PBRM1  | SNV    |    |    |     |    |    |    |    |
| 7      | GAIN   |    |    |     |    |    |    |    |
| 6      | LOSS   |    |    |     |    |    |    |    |
| 4      | LOSS   |    |    |     |    |    |    |    |
| 10q    | LOSS   |    |    |     |    |    |    |    |
| 11     | LOSS   |    |    |     |    |    |    |    |
| 14q    | LOSS   |    |    |     |    |    |    |    |
| 17p    | LOSS   |    |    |     |    |    |    |    |
| 18p    | LOSS   |    |    |     |    |    |    |    |
| DNAH10 | synSNV |    |    |     |    |    |    |    |
| TLN2   | SNV    |    |    |     |    |    |    |    |
| TP53   | SNV    |    |    |     |    |    |    |    |
| LRP2   | SNV    |    |    |     |    |    |    |    |
| BAP1   | SNV    |    |    |     |    |    |    |    |
| PLEC   | SNV    |    |    |     |    |    |    |    |
| 3p     | GAIN   |    |    |     |    |    |    |    |
| 8q     | GAIN   |    |    |     |    |    |    |    |
| 9      | GAIN   |    |    |     |    |    |    |    |
| 10p    | GAIN   |    |    |     |    |    |    |    |
| 12p    | GAIN   |    |    |     |    |    |    |    |
| 1p     | LOSS   |    |    |     |    |    |    |    |
| 8p     | LOSS   |    |    |     |    |    |    |    |
| 13q    | LOSS   |    |    |     |    |    |    |    |
| 18q    | LOSS   |    |    |     |    |    |    |    |
| 20p    | LOSS   |    |    |     |    |    |    |    |
| 2p     | GAIN   |    |    |     |    |    |    |    |
| 19q    | GAIN   |    |    |     |    |    |    |    |
| 20q    | GAIN   |    |    |     |    |    |    |    |
| USH2A  | SNV    |    |    |     |    |    |    |    |
| OBSCN  | SNV    |    |    |     |    |    |    |    |
| BAP1   | INDEL  |    |    |     |    |    |    |    |
| SYNE1  | SNV    |    |    |     |    |    |    |    |
| BAP1   | INDEL  |    |    |     |    |    |    |    |
| 21q    | GAIN   |    |    |     |    |    |    |    |
| 9      | LOSS   |    |    |     |    |    |    |    |
| 17q    | LOSS   |    |    |     |    |    |    |    |
| CSMD3  | SNV    |    |    |     |    |    |    |    |
| SETD2  | INDEL  |    |    |     |    |    |    |    |
| 2q     | GAIN   |    |    |     |    |    |    |    |
| 17q    | GAIN   |    |    |     |    |    |    |    |
| 20p    | GAIN   |    |    |     |    |    |    |    |
| 10p    | LOSS   |    |    |     |    |    |    |    |
| 21q    | LOSS   |    |    |     |    |    |    |    |
| 22q    | LOSS   |    |    |     |    |    |    |    |
| DNAH3  | INDEL  |    |    |     |    |    |    |    |
| 22q    | GAIN   |    |    |     |    |    |    |    |
| 12q    | GAIN   |    |    |     |    |    |    |    |
| 19q    | LOSS   |    |    |     |    |    |    |    |

| ID  | Type | R1 | R5 | R10 | R9 | R4 | R3 | R8 |
|-----|------|----|----|-----|----|----|----|----|
| 3   | LOSS |    |    |     |    |    |    |    |
| 5   | GAIN |    |    |     |    |    |    |    |
| 19p | LOSS |    |    |     |    |    |    |    |
