# Supplementary material for: Deterministic Evolutionary Trajectories Influence Primary Tumor Growth: TRACERx Renal
Source: PubMed Central journal article supplement (PMC5938372; doi:10.1016/j.cell.2018.03.043), 2018-04-19

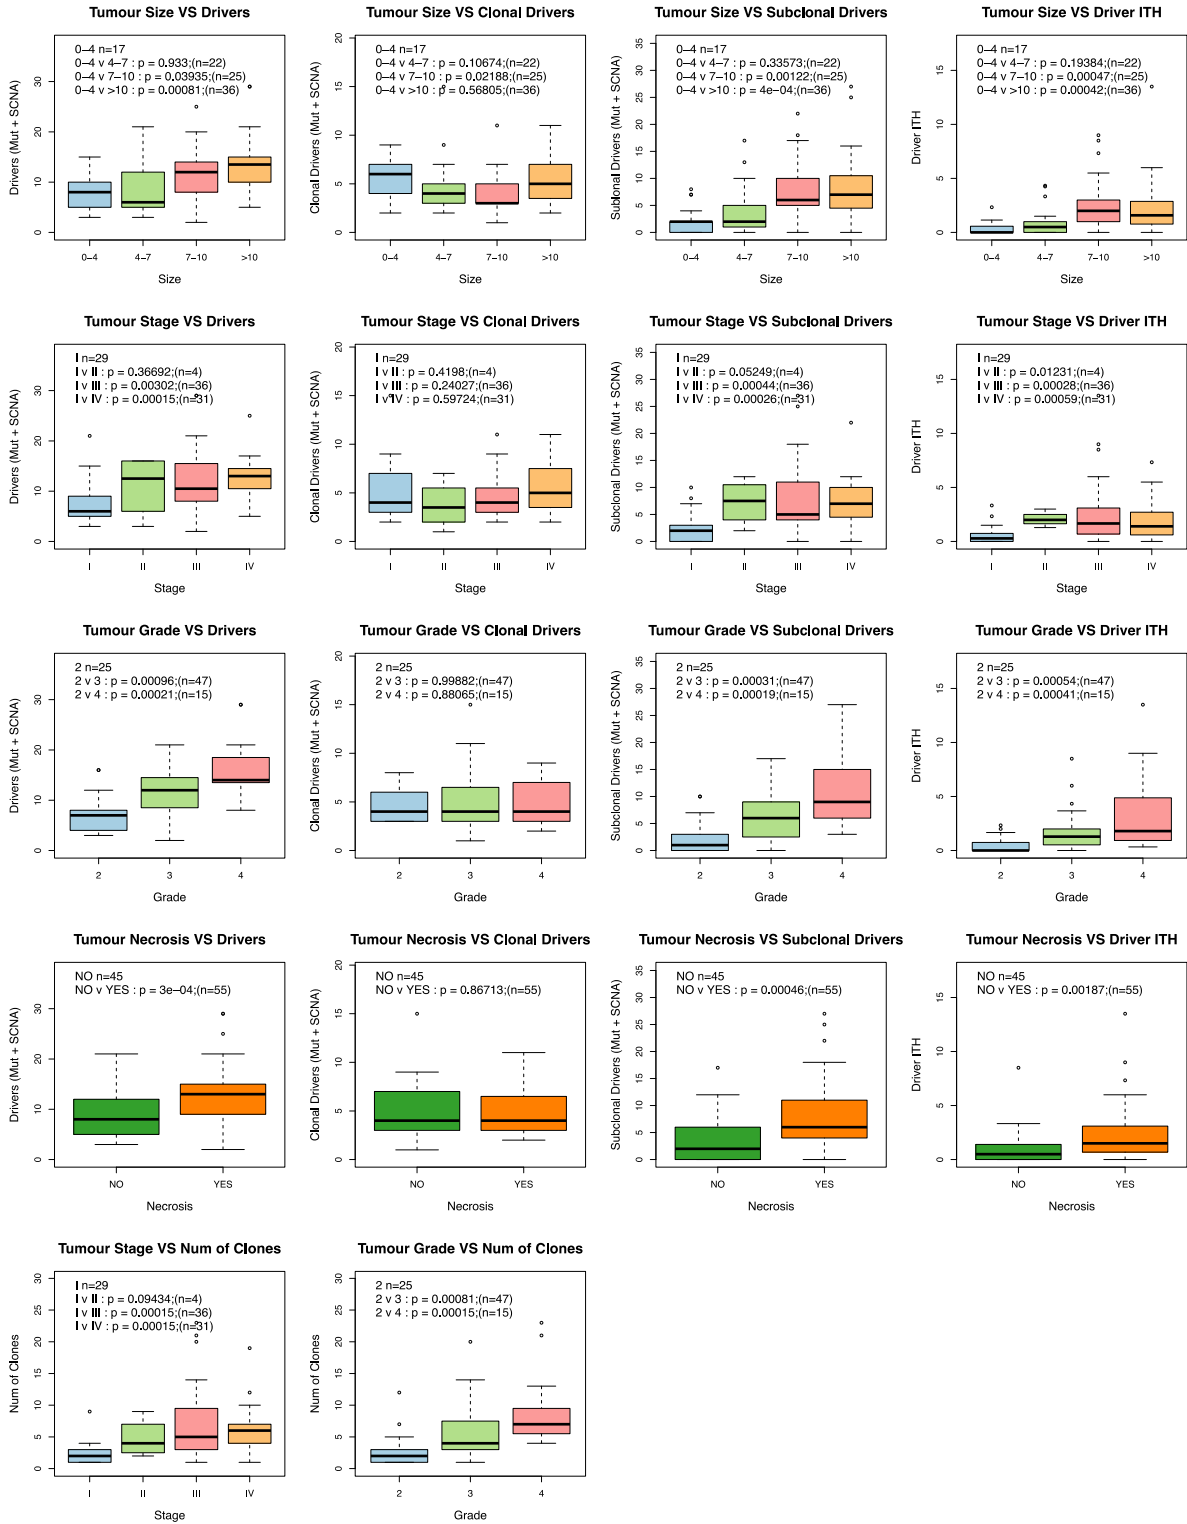

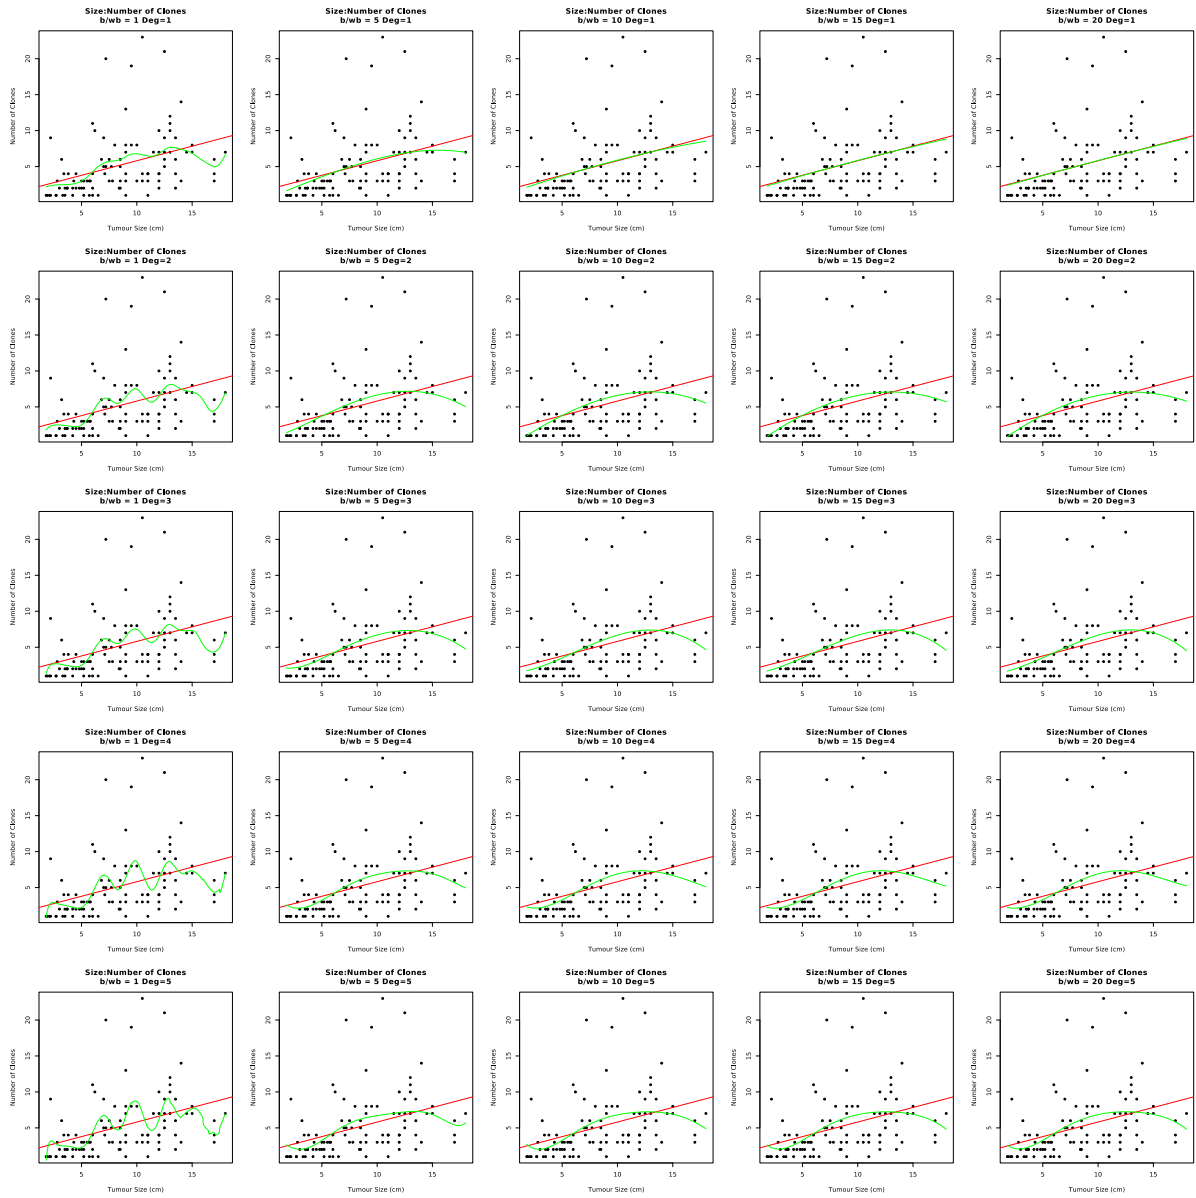

Supplement: mmc9.pdf [file mmc9.pdf]
